# Supplementary material for: Application and testing of risk screening tools for nanomaterial risk analysis
Source: Royal Society of Chemistry journal article supplement (doi:10.1039/c8en00518d), 2018-01-01
Supplement: c8en00518d1.pdf [file c8en00518d1.pdf]

### Supplementary Information

Table S-1. ENMs used in case study. ENM = engineered nanomaterial; NP = nanoparticle; NA = not available or applicable; \*Reported from commercial supplier

| ENM (NPs)                      | Size/ NP Diameter * (nm) | Specific Surface Area * (m <sup>2</sup> /g) | Volume/ Mass/ Quantity Available* (g) | Price* (\$)                                 | Supplier                                                                                                | Commercial Name by Supplier                                                     | Product ID          |
|--------------------------------|--------------------------|---------------------------------------------|---------------------------------------|---------------------------------------------|---------------------------------------------------------------------------------------------------------|---------------------------------------------------------------------------------|---------------------|
| Al                             | 60-80                    | NA                                          | NA                                    | 116 (25g); 356 (100 g)                      | Alfa Aesar                                                                                              | Aluminum powder, spherical, APS 60-80nm                                         | 45546               |
| Al <sub>2</sub> O <sub>3</sub> | 60                       | NA                                          | 25                                    | NA (Already in NC State inventory)          | Alfa Aesar                                                                                              | Aluminum oxide, 99.9%                                                           | 40456               |
| CuO                            | 30-50                    | 13                                          | 50                                    | 34.7 (10g); 107 (50g)                       | Alfa Aesar                                                                                              | Copper (II) oxide, nanopowder                                                   | 44663               |
| Fe <sub>2</sub> O <sub>3</sub> | 3                        | 250                                         | 250                                   | 143 (50g); 547 (250g); 1592 (1kg)           | Alfa Aesar                                                                                              | Iron (III) oxide, nanopowder, 99.95%                                            | 44119               |
| MgO                            | 100                      | >7.3                                        | 500                                   | 45.80 (25g); 135 (100g); 523 (500g)         | Alfa Aesar                                                                                              | Magnesium oxide, nanopowder, 99+%                                               | 44733               |
| MnO <sub>2</sub>               | 50                       | NA                                          | 100                                   | 65 (25g); 135 (100g); 428 (500g); 685 (1kg) | NPs synthesized in NC State lab (grown on nanofibrous filter media); Can also be purchased <sup>1</sup> | Manganese dioxide MnO <sub>2</sub> nanoparticles (MnO <sub>2</sub> , 98%, 50nm) | US3319 <sup>1</sup> |
| TiO <sub>2</sub> (anatase)     | 15                       | 240                                         | 500                                   | 64.10 (25g); 146 (100g); 477 (500g)         | Alfa Aesar                                                                                              | Titanium (IV) oxide, anatase, nanopowder, 99.7%                                 | 045603              |
| ZrO <sub>2</sub>               | <100                     | >25                                         | 25                                    | 31.75 (5g); 112 (25g)                       | Sigma-Aldrich                                                                                           | Zirconium (IV) oxide, nanopowder, <100 nm particle size (TEM)                   | 544760              |

Table S-2. NanoRiskCat Steps<sup>2,3</sup>

| Category           | Step                                                          | Details                                                                                                                                                                                                                                                                                                                                                                                                                                                                                                                                                                                                                                                                                                                                                                                                                                                                                                                                                                                                                                                                                                                                                                                                                                                                                |
|--------------------|---------------------------------------------------------------|----------------------------------------------------------------------------------------------------------------------------------------------------------------------------------------------------------------------------------------------------------------------------------------------------------------------------------------------------------------------------------------------------------------------------------------------------------------------------------------------------------------------------------------------------------------------------------------------------------------------------------------------------------------------------------------------------------------------------------------------------------------------------------------------------------------------------------------------------------------------------------------------------------------------------------------------------------------------------------------------------------------------------------------------------------------------------------------------------------------------------------------------------------------------------------------------------------------------------------------------------------------------------------------|
| Problem Definition | 1. Short titles for use scenario(s) and ENM identification    | <ul style="list-style-type: none"> <li>ENM-enabled product clearly described in short title, defining the type of ENM(s) used, and intended use</li> </ul>                                                                                                                                                                                                                                                                                                                                                                                                                                                                                                                                                                                                                                                                                                                                                                                                                                                                                                                                                                                                                                                                                                                             |
| Exposure           | 2. Exposure potential assessment                              | <ul style="list-style-type: none"> <li>User assesses potential exposure according to the location of the ENM in the product (e.g., ENM used on a structured surface, NPs suspended in liquids, NPs suspended in air, etc.) based on Hansen et al.<sup>4</sup></li> <li>If high exposure potential (e.g., NP suspended in liquid matrix intended for direct skin contact) a red dot triggered; if medium exposure a yellow dot triggered; if low exposure (e.g., NP suspended in solid matrix with very low potential for release) a green dot triggered; if unknown a grey dot triggered;</li> <li>Same procedure performed for professional end-users, consumers, and environmental recipients</li> </ul>                                                                                                                                                                                                                                                                                                                                                                                                                                                                                                                                                                             |
| Human Hazard       | 3. Decision tree for potential human health hazard assessment | <ul style="list-style-type: none"> <li>Decision tree based on the following nodes: <ol style="list-style-type: none"> <li>ENM classification as High Aspect Ratio Nanoparticle (HARN)?</li> <li>ENM in bulk form known or suspected to cause of serious detrimental effects based on EU's Regulation NO 1272/2008 (CLP Legislation<sup>5</sup>), such as e.g. acute toxicity category 1-4; germ cell mutagenicity category 1A, 1B, or 2, carcinogenicity category 1A, 1B, or 2, etc.?</li> <li>ENM in bulk form classified for less severe effects based on EU's CLP Legislation, such as e.g., skin corrosion/irritation, specific target organ toxicity-single exposure category 3, serious eye damage/irritation category 2?</li> <li>ENM induce acute toxicity?</li> <li>ENM cause other serious effects, e.g., genotoxic, mutagenic, carcinogenic, respiratory, cardiovascular, neurotoxic, reproductive effects?</li> </ol> </li> <li>If "yes" to any of these questions, a red (high hazard potential) colored dot will be triggered; if "maybe" or inconclusive evidence but gives cause for concern a yellow (medium hazard potential) colored dot triggered; if "no" a green dot (low hazard potential); and if unknown or insufficient data a grey dot triggered</li> </ul> |
| Ecological Hazard  | 4. Decision tree for potential ecological hazard assessment   | <ul style="list-style-type: none"> <li>Decision tree based on the following nodes: <ol style="list-style-type: none"> <li>ENM in bulk form known or suspected to cause of serious detrimental effects based on EU's Regulation NO 1272/2008 (CLP Legislation<sup>5</sup>), such as e.g. acute 1 or chronic 1 and chronic 2 and level B CLP classifications.?</li> <li>Is the ENM LC50 <math>\leq 10</math> mg/L?</li> <li>ENM in bulk form classified for less severe effects based on EU's CLP Legislation, such as e.g., significant effect of ENM without EC50 or LC50 values?</li> <li>Is the ENM LC50 <math>\leq 100</math> mg/L?</li> <li>Does the ENM have a half-life &gt; 40 days?</li> <li>Does the ENM have a bioconcentration factor &gt;0.1 or &gt; 50?</li> <li>Does the ENM readily disperse or have long range transport in the environment?</li> <li>Is the ENM novel?</li> </ol> </li> <li>If "yes" to any of these questions, a red (high hazard potential) colored dot will be triggered; if "maybe" or inconclusive evidence but gives cause for concern a yellow (medium hazard potential) colored dot triggered; if "no" a green dot (low hazard potential); and if unknown or insufficient data a grey</li> </ul>                                              |

| Category         | Step               | Details                                                                                                                                                                                                                                                                                                                   |
|------------------|--------------------|---------------------------------------------------------------------------------------------------------------------------------------------------------------------------------------------------------------------------------------------------------------------------------------------------------------------------|
|                  |                    | dot triggered                                                                                                                                                                                                                                                                                                             |
| Generated Output | 5. Compile results | <ul style="list-style-type: none"> <li>User compiles the color-coded dots from the exposure potential for professional end-users, consumers, and environmental recipients (Step 2) and hazard potential for humans and environment (Steps 3-4);</li> <li>End result is five color-coded dots for communication</li> </ul> |

Table S-3. LICARA nanoSCAN Steps<sup>6</sup>. The outlined steps are included in the 9 different tabs within the web-based tool.

| Category           | Step                      | Details                                                                                                                                                                                                                                                                                                                                                                                                                                                                                                                                                                                                       |
|--------------------|---------------------------|---------------------------------------------------------------------------------------------------------------------------------------------------------------------------------------------------------------------------------------------------------------------------------------------------------------------------------------------------------------------------------------------------------------------------------------------------------------------------------------------------------------------------------------------------------------------------------------------------------------|
| Welcome            | 1. Introduction           | <ul style="list-style-type: none"> <li>Welcome page to LICARA nanoSCAN</li> <li>Introductory information on overall scope and purpose of tool</li> <li>User can view overall framework, including the different components used in the tool evaluation</li> <li>User can start a new evaluation (“nanoSCAN”) under “Start nanoSCAN” or can view, load, edit, or remove saved evaluations under “Your nanoSCANS”</li> </ul>                                                                                                                                                                                    |
| Problem Definition | 2. Start                  | <ul style="list-style-type: none"> <li>User provides identifying information on the nanoproduct, including name and date</li> <li>Scenario can later be saved using this name and identifying information</li> </ul>                                                                                                                                                                                                                                                                                                                                                                                          |
|                    | 3. Nano product           | <ul style="list-style-type: none"> <li>Box 0. Nano product and legislation</li> <li>User responds to questions using drop-down menus and blank comment fields within three groups: “Type of nano material and application,” “Nano-relevance,” and “Legislation”</li> <li>There are 12 questions total</li> <li>This Box helps the user determine whether LICARA nanoSCAN is a relevant tool (i.e. ENM-relevance) and checks the compliance of the nanoproduct with current European regulation</li> </ul>                                                                                                     |
| Benefit Evaluation | 4. Environmental benefits | <ul style="list-style-type: none"> <li>Box 1. Environmental benefits</li> <li>All questions relate to the performance of a nanoproduct compared to a conventional product</li> <li>User responds to questions using drop-down menus within three groups: “Manufacturing phase of the nanoproduct versus conventional product,” “Use phase (only for final products and articles),” and “End-of-life (only for final products and articles)”; the latter two groups may be completed for intermediate nanoproducts to help improve quality of decision-making</li> <li>There are 20 questions total</li> </ul> |
|                    | 5. Economic benefits      | <ul style="list-style-type: none"> <li>Box 2. Economic benefits</li> <li>All questions relate to the performance of a nanoproduct compared to a conventional product</li> <li>User responds to questions using drop-down menus within three groups: “Market potential,” “Profitability,” and “Development stage”</li> <li>There are 5 questions total</li> </ul>                                                                                                                                                                                                                                              |
|                    | 6. Societal benefits      | <ul style="list-style-type: none"> <li>Box 3. Societal benefits</li> <li>All questions relate to the performance of a nanoproduct compared to a conventional product</li> <li>User responds to questions using drop-down menus within three groups: “Technological breakthrough,” “Highly qualified labour force,”</li> </ul>                                                                                                                                                                                                                                                                                 |

| Category         | Step                              | Details                                                                                                                                                                                                                                                                                                                                                                                                                                                                                                                                                                                                                                                                                                                                                                                                                                                                                                                                                                                                                                                                                                                                                                                        |
|------------------|-----------------------------------|------------------------------------------------------------------------------------------------------------------------------------------------------------------------------------------------------------------------------------------------------------------------------------------------------------------------------------------------------------------------------------------------------------------------------------------------------------------------------------------------------------------------------------------------------------------------------------------------------------------------------------------------------------------------------------------------------------------------------------------------------------------------------------------------------------------------------------------------------------------------------------------------------------------------------------------------------------------------------------------------------------------------------------------------------------------------------------------------------------------------------------------------------------------------------------------------|
|                  |                                   | <ul style="list-style-type: none"> <li>and “Improving global health or food situation”</li> <li>• There are 3 questions total</li> </ul>                                                                                                                                                                                                                                                                                                                                                                                                                                                                                                                                                                                                                                                                                                                                                                                                                                                                                                                                                                                                                                                       |
| Risk Evaluation  | 7. Public and environmental risks | <ul style="list-style-type: none"> <li>• Box 4. Public health &amp; environmental risks</li> <li>• All questions based on Precautionary Matrix<sup>7</sup></li> <li>• User responds to questions using drop-down menus within three groups: “System knowledge,” “Potential effect,” and “Potential input into the environment”</li> <li>• There are 9 questions total</li> </ul>                                                                                                                                                                                                                                                                                                                                                                                                                                                                                                                                                                                                                                                                                                                                                                                                               |
|                  | 8. Occupational health risks      | <ul style="list-style-type: none"> <li>• Box 5. Occupational health risks</li> <li>• User is directed to Stoffenmanager Nano 1.0<sup>8</sup> which is a separate web-based tool. After accessing the site, the user needs to create an account and log in</li> <li>• User starts a new evaluation (termed “risk assessment”)</li> <li>• User responds to questions using drop-down menus and blank comment fields within six steps: 1. General, 2. Product characteristics, 3. Handling/Process, 4. Working area, 5. Local controls measures and personal protective equipment, 6. Risk assessment</li> <li>• There are 27 questions total</li> <li>• The output in the final step is a summary of calculated exposure-hazard-class and risk scores in the Risk Assessment step</li> <li>• User can save the evaluation, export the results, and return to the evaluation if needed</li> <li>• Returning to LICARA nanoSCAN, the user enters the final task weighted hazard class (e.g. C) and exposure class (e.g. 2) scores from the Stoffenmanager Nano 1.0 evaluation in a matrix (e.g. C2) under the appropriate life cycle stage (i.e., manufacture, processing, application)</li> </ul> |
|                  | 9. Consumer risks                 | <ul style="list-style-type: none"> <li>• Box 6. Consumer health risks</li> <li>• Relevant only for consumer or consumer/professional products, based on exposure potential using Hansen et al.<sup>4</sup> framework and NanoRiskCat exposure profile<sup>9</sup></li> <li>• User responds to questions using drop-down menus within one group: “Hazard &amp; exposure by consumers during use phase”</li> <li>• There are 2 questions total</li> </ul>                                                                                                                                                                                                                                                                                                                                                                                                                                                                                                                                                                                                                                                                                                                                        |
| Generated Output | 10. Decision support              | <ul style="list-style-type: none"> <li>• Final generated output displayed according to separate benefit and risk evaluations as well as a combined benefit-risk evaluation</li> <li>• User can name and save the evaluation (nanoSCAN)</li> </ul>                                                                                                                                                                                                                                                                                                                                                                                                                                                                                                                                                                                                                                                                                                                                                                                                                                                                                                                                              |

Table S-4. NanoGRID Steps<sup>10</sup>. The outlined steps are included in the 5 different tabs within the MS-excel tool.

| Category           | Step                               | Details                                                                                                                                                                                                                                                                                                                                                |
|--------------------|------------------------------------|--------------------------------------------------------------------------------------------------------------------------------------------------------------------------------------------------------------------------------------------------------------------------------------------------------------------------------------------------------|
| Welcome            | 1. Home tab                        | <ul style="list-style-type: none"> <li>• Welcome page to NanoGRID</li> <li>• Overall framework of NanoGRID</li> <li>• User can start a new evaluation (“profile”) under “Start” button or can view, load, edit, or remove saved evaluations</li> </ul>                                                                                                 |
| Problem Definition | 2. ENM and ENM-product description | <ul style="list-style-type: none"> <li>• Tier 1. Basic Information, Technology Category, and ENM Definition</li> <li>• Tier 1 helps the user determine whether the ENM is of concern, if ENM-specific test and methods are required (or if conventional chemical risk assessment methods would be suitable), and if Tiers 2-5 are necessary</li> </ul> |

| Category | Step                                 | Details                                                                                                                                                                                                                                                                                                                                                                                                                                                                                                                                                                                                                                                                                                                                                                                                                                                                                                                                                                                                                                                                                                                                                                                                                                                                                                                                                                                                                                                                                                                                                                                                                                                                                                                    |
|----------|--------------------------------------|----------------------------------------------------------------------------------------------------------------------------------------------------------------------------------------------------------------------------------------------------------------------------------------------------------------------------------------------------------------------------------------------------------------------------------------------------------------------------------------------------------------------------------------------------------------------------------------------------------------------------------------------------------------------------------------------------------------------------------------------------------------------------------------------------------------------------------------------------------------------------------------------------------------------------------------------------------------------------------------------------------------------------------------------------------------------------------------------------------------------------------------------------------------------------------------------------------------------------------------------------------------------------------------------------------------------------------------------------------------------------------------------------------------------------------------------------------------------------------------------------------------------------------------------------------------------------------------------------------------------------------------------------------------------------------------------------------------------------|
|          |                                      | <p>to complete to characterize the environmental, health, and safety concerns of the ENM</p> <ul style="list-style-type: none"> <li>• User responds to questions or selects applicable options using drop-down menus, radio buttons, and blank comment fields within four tabs: “Basic information,” “Technology Category,” “Nanomaterial Definition,” and “Special Properties”</li> <li>• “Basic information” tab has three sub-tabs: “Instructions,” “Initial questions,” and “Technical questions” that ask the user about the ENM, its properties, and how it is used in a product.</li> <li>• “Technology category” characterizes the location of the ENM in a product following Hansen et al.<sup>4</sup>; “Nanomaterial Definition” describes the ENM based on physico-chemical properties (i.e., ENM definitions used by regulatory agencies, size, aggregation, specific surface area, and unique/novel properties); “Special Properties” described the ENM based on special or unique properties correlated with environmental, health, or safety hazards (e.g., shape, charge, reactivity, dustiness, porosity)</li> <li>• There are a maximum of 42 questions or options to select in Tier 1</li> </ul>                                                                                                                                                                                                                                                                                                                                                                                                                                                                                                        |
| Exposure | 3. Release potential                 | <ul style="list-style-type: none"> <li>• Tier 2. Release, Hazard Identification, and Testing Identification</li> <li>• Tier 2 helps the user understand the release potential of the ENM from the ENM-enabled product, whether additional testing is needed to characterize potential risks/concerns, and helps the user better understand the release of ENM through various assumptions or laboratory-based tests</li> <li>• User responds to questions or selects applicable options using drop-down menus, radio buttons, and blank comment fields within three tabs: “Release,” “Hazard Identification,” and “Testing Identification”</li> <li>• “Release” characterizes the release of the ENM from the product, based on Hansen et al.<sup>4</sup>, and describes a release scenario (e.g., release of 100% of ENM from product), also in reference to known hazard concentrations (three options); “Hazard Identification” screens the ENM for potential environmental and human health hazards</li> <li>• Predicted Environmental Concentration (PEC) can be estimated using the SimpleBoxforNano<sup>11</sup>, Mend Nano<sup>12</sup>, or existing values from the literature</li> <li>• Predicted No Effect Concentration (PNEC) is estimated using existing values from the literature, as calculated using choice of two approaches (US Army Method vs. EU ECHA Method<sup>13,14</sup>). For these values, the user enters acute and/or chronic data</li> <li>• If the PEC/PNEC &lt; 1, no risk is expected; if PEC/PNEC &gt; 1, a potential risk cannot be dismissed or neglected, and the user is guided to Tier 3</li> <li>• There are a maximum of 15 questions or options to select in Tier 2</li> </ul> |
|          | 4. Environmental persistence testing | <ul style="list-style-type: none"> <li>• Tier 3. Environmental fate and persistence of ENMs in aqueous media</li> <li>• Tier 3 guides the user through various laboratory-based tests to understand the environmental fate and persistence of ENMs in aqueous media</li> <li>• User responds to questions, selects applicable options, or fills in blank comment fields in four main tabs, Levels 1-4, that correspond to different ENM fate and persistence tests the user can perform</li> <li>• Level 1 is an initial description of the media and ENM concentration; Level 2 is an initial characterization of ENM size and surface charge; Level 3 is a test of particle stability and dissolution over time; and Level</li> </ul>                                                                                                                                                                                                                                                                                                                                                                                                                                                                                                                                                                                                                                                                                                                                                                                                                                                                                                                                                                                    |

| Category         | Step                                     | Details                                                                                                                                                                                                                                                                                                                                                                                                                                                                                                                                                                                                                                                                                                                                                                                                                                                                                                                                                                                                                                                      |
|------------------|------------------------------------------|--------------------------------------------------------------------------------------------------------------------------------------------------------------------------------------------------------------------------------------------------------------------------------------------------------------------------------------------------------------------------------------------------------------------------------------------------------------------------------------------------------------------------------------------------------------------------------------------------------------------------------------------------------------------------------------------------------------------------------------------------------------------------------------------------------------------------------------------------------------------------------------------------------------------------------------------------------------------------------------------------------------------------------------------------------------|
|                  |                                          | <p>4 evaluate the results variability to provide further guidance and testing if needed</p> <ul style="list-style-type: none"> <li>• There are a maximum of approx. 20 questions or options to select in Tier 3, depending on the number and behavior of concentrations selected</li> </ul>                                                                                                                                                                                                                                                                                                                                                                                                                                                                                                                                                                                                                                                                                                                                                                  |
| Hazard           | 5. Environment and health hazard testing | <ul style="list-style-type: none"> <li>• Tier 4. Aquatic, Terrestrial, Human Health hazard data</li> <li>• Tier 4 guides the user through various laboratory-based tests to understand environmental health and/or human health hazard assessment related to the ENM</li> <li>• User responds to questions or selects applicable options using drop-down menus, radio buttons, and blank comment fields within three main tabs: "Aquatic," "Terrestrial," "Human Health" (not yet functional)</li> <li>• In each tab, the user has the possibility to choose between "acute," "chronic," and "elutriate" toxicity tests for a maximum of two organisms by test type and three endpoints by organism</li> <li>• User has direct access to toxicity protocol link</li> <li>• For each toxicity test type (e.g. acute) NanoGRID calculates the PEC/PNEC ratio</li> <li>• There is a large number of questions or options that are possible (~100) for the user to select in Tier 4, depending on the number of test, organism and endpoints selected</li> </ul> |
|                  | 6. In depth product investigation        | <ul style="list-style-type: none"> <li>• Tier 5. In Depth Product investigation</li> <li>• Not yet available in current version</li> </ul>                                                                                                                                                                                                                                                                                                                                                                                                                                                                                                                                                                                                                                                                                                                                                                                                                                                                                                                   |
| Generated Output | 7. Decision Support                      | <ul style="list-style-type: none"> <li>• After completing all necessary Tiers, user can click on "Generate Report" to produce the final output pdf file</li> <li>• Final report provides an overview of the evaluation according to each tier and guidance towards testing that may be needed related to the selected ENM</li> </ul>                                                                                                                                                                                                                                                                                                                                                                                                                                                                                                                                                                                                                                                                                                                         |
|                  | 8.-Credit/Point of Contact               | <ul style="list-style-type: none"> <li>• Contact information for individuals who contributed to the NanoGRID development according to subject matter expertise, technical development, and technical coordination (N=14)</li> </ul>                                                                                                                                                                                                                                                                                                                                                                                                                                                                                                                                                                                                                                                                                                                                                                                                                          |

Table S-5. Detailed results from NanoRiskCat applied to ENMs in case study. ENM = engineered nanomaterial; NP = nanoparticle.

| ENM (NP)                           | Exposure Potential                                                                                              |                                                                                                                                                                                                            |                                                                                                                                                                                                            | Hazard Evaluation                                                                                                                                                             |                                                                                                                                                                                                                                                             |
|------------------------------------|-----------------------------------------------------------------------------------------------------------------|------------------------------------------------------------------------------------------------------------------------------------------------------------------------------------------------------------|------------------------------------------------------------------------------------------------------------------------------------------------------------------------------------------------------------|-------------------------------------------------------------------------------------------------------------------------------------------------------------------------------|-------------------------------------------------------------------------------------------------------------------------------------------------------------------------------------------------------------------------------------------------------------|
|                                    | Professional End-User                                                                                           | Consumers                                                                                                                                                                                                  | Environment                                                                                                                                                                                                | Health                                                                                                                                                                        | Ecological                                                                                                                                                                                                                                                  |
| <b>Al</b>                          | High: Due to dry, loose state of NPs as purchased from supplier and handled by end-users in laboratory settings | Medium: Due to loose (unbound) state of NPs used in water treatment application (hypothetical at this stage of innovation). Cannot rule out that NPs will not be released from water treatment application | Medium: Due to loose (unbound) state of NPs used in water treatment application (hypothetical at this stage of innovation). Cannot rule out that NPs will not be released from water treatment application | Medium: Cytotoxicity studies <sup>15-17</sup> ; irritation <sup>18-19</sup> ; pulmonary disease <sup>20</sup>                                                                 | High: EC50, 4.7 µg/mL <sup>16</sup> ; LD50 (48h), 7.483 mg/L <sup>21</sup>                                                                                                                                                                                  |
| <b>Al<sub>2</sub>O<sub>3</sub></b> | High: Due to dry, loose state of NPs as purchased from supplier and handled by end-users in laboratory settings | Medium: Due to loose (unbound) state of NPs used in water treatment application (hypothetical at this stage of innovation). Cannot rule out that NPs will not be released from water treatment application | Medium: Due to loose (unbound) state of NPs used in water treatment application (hypothetical at this stage of innovation). Cannot rule out that NPs will not be released from water treatment application | High: Inflammatory effects <sup>22</sup> ; expression of neuro-degeneration related genes <sup>23</sup> ; impacts on lung, brain, liver, kidneys, intestines <sup>22-24</sup> | High: EC50 (72h), 0.162 mg/L <sup>25</sup> ; EC50 (48h), 114.357 (mg/L) <sup>26</sup> ; LC50 (48h), 162.392 mg/L <sup>26</sup> ; some indications of persistency <sup>9, 27</sup>                                                                           |
| <b>CuO</b>                         | High: Due to dry, loose state of NPs as purchased from supplier and handled by end-users in laboratory settings | Medium: Due to loose (unbound) state of NPs used in water treatment application (hypothetical at this stage of innovation). Cannot rule out that NPs will not be released from water                       | Medium: Due to loose (unbound) state of NPs used in water treatment application (hypothetical at this stage of innovation). Cannot rule out that NPs will not be released from water treatment application | High: Cytotoxicity and DNA damage, intracellular reactive oxygen species (ROS) generation, DNA lesions <sup>28, 29</sup> ; respiratory irritation <sup>30</sup>               | High: High ecotoxicity with long lasting effects <sup>31</sup> ; EC50, 0.46 mg/L - >250 mg/L values reported <sup>32</sup> ; EC50 (72h), 0.71 mg/L, NOEC, 0.421 mg/L <sup>33</sup> ; LC50 (48h), 3.2 mg/L, LC50 (24h), 2.1 mg/L, NOEC (48h), 0.5 mg/L, NOEC |

| ENM (NP)                           | Exposure Potential                                                                                                                                                                           |                                                                                                                                                                                                            |                                                                                                                                                                                                            | Hazard Evaluation                                                                                                                                                       |                                                                                                                                                                          |
|------------------------------------|----------------------------------------------------------------------------------------------------------------------------------------------------------------------------------------------|------------------------------------------------------------------------------------------------------------------------------------------------------------------------------------------------------------|------------------------------------------------------------------------------------------------------------------------------------------------------------------------------------------------------------|-------------------------------------------------------------------------------------------------------------------------------------------------------------------------|--------------------------------------------------------------------------------------------------------------------------------------------------------------------------|
|                                    | Professional End-User                                                                                                                                                                        | Consumers                                                                                                                                                                                                  | Environment                                                                                                                                                                                                | Health                                                                                                                                                                  | Ecological                                                                                                                                                               |
|                                    |                                                                                                                                                                                              | treatment application                                                                                                                                                                                      |                                                                                                                                                                                                            |                                                                                                                                                                         | (24h), 0.5 mg/L <sup>34</sup>                                                                                                                                            |
| <b>Fe<sub>2</sub>O<sub>3</sub></b> | High: Due to dry, loose state of NPs as purchased from supplier and handled by end-users in laboratory settings                                                                              | Medium: Due to loose (unbound) state of NPs used in water treatment application (hypothetical at this stage of innovation). Cannot rule out that NPs will not be released from water treatment application | Medium: Due to loose (unbound) state of NPs used in water treatment application (hypothetical at this stage of innovation). Cannot rule out that NPs will not be released from water treatment application | High: Accumulation in brain, liver, kidneys <sup>35-37</sup> ; inflammatory effects <sup>38</sup> ; severe damage in liver and lungs; tumorigenic effects <sup>39</sup> | High: LC50, 53.35 mg/L <sup>40</sup> ; LC50, 99.064-259.956 mg/L <sup>41</sup> ; Potentially persistent and not likely to be transported in environment <sup>9, 42</sup> |
| <b>MgO</b>                         | High: Due to dry, loose state of NPs as purchased from supplier and handled by end-users in laboratory settings                                                                              | Medium: Due to loose (unbound) state of NPs used in water treatment application (hypothetical at this stage of innovation). Cannot rule out that NPs will not be released from water treatment application | Medium: Due to loose (unbound) state of NPs used in water treatment application (hypothetical at this stage of innovation). Cannot rule out that NPs will not be released from water treatment application | High: Serious eye damage; eye, skin, respiratory irritant <sup>43</sup>                                                                                                 | High: Very toxic to aquatic life with long-lasting effects <sup>43</sup> ; LC50 (96h), 428 mg/L, EC50 (48h), 175 mg/L <sup>44</sup>                                      |
| <b>MnO<sub>2</sub></b>             | Medium: Due to NPs grown on nanofibrous filter media by NC State researchers. The NPs are grown on surfaces of fibers, attached to fibers, as demonstrated by sonification experiments by NC | Medium: Due to loose (unbound) state of NPs used in water treatment application (hypothetical at this stage of innovation). Cannot rule out that NPs will not be released from water treatment application | Medium: Due to loose (unbound) state of NPs used in water treatment application (hypothetical at this stage of innovation). Cannot rule out that NPs will not be released from water treatment application | High: Acute Tox 4, Harmonized classification, Annex VI of Regulation EC No 1272/2008 (CLP) <sup>45</sup>                                                                | High: EC50, 10-100 mg/L <sup>46</sup>                                                                                                                                    |



| ENM (NP)               | Exposure Potential                                                                                              |                                                                                                                                                                                                            |                                                                                                                                                                                                            | Hazard Evaluation                                                                                                                                                                                                                                                                                            |                                                                                                                                                                     |
|------------------------|-----------------------------------------------------------------------------------------------------------------|------------------------------------------------------------------------------------------------------------------------------------------------------------------------------------------------------------|------------------------------------------------------------------------------------------------------------------------------------------------------------------------------------------------------------|--------------------------------------------------------------------------------------------------------------------------------------------------------------------------------------------------------------------------------------------------------------------------------------------------------------|---------------------------------------------------------------------------------------------------------------------------------------------------------------------|
|                        | Professional End-User                                                                                           | Consumers                                                                                                                                                                                                  | Environment                                                                                                                                                                                                | Health                                                                                                                                                                                                                                                                                                       | Ecological                                                                                                                                                          |
|                        | State. No release studies performed however from the nanofibers containing MnO <sub>2</sub> NPs                 |                                                                                                                                                                                                            |                                                                                                                                                                                                            |                                                                                                                                                                                                                                                                                                              |                                                                                                                                                                     |
| <b>TiO<sub>2</sub></b> | High: Due to dry, loose state of NPs as purchased from supplier and handled by end-users in laboratory settings | Medium: Due to loose (unbound) state of NPs used in water treatment application (hypothetical at this stage of innovation). Cannot rule out that NPs will not be released from water treatment application | Medium: Due to loose (unbound) state of NPs used in water treatment application (hypothetical at this stage of innovation). Cannot rule out that NPs will not be released from water treatment application | High: Suspected human carcinogen for inhalation, (Carc. 2; H350 <sup>47</sup> )                                                                                                                                                                                                                              | High: EC50 (72h), 1.3-3.44 mg/L <sup>48</sup> ; EC50 (72h), 3.8 mg/L <sup>49</sup> ; EC50 (48h), 8.26 mg/L <sup>50</sup> ; other LC50 values < 10mg/L <sup>32</sup> |
| <b>ZrO<sub>2</sub></b> | High: Due to dry, loose state of NPs as purchased from supplier and handled by end-users in laboratory settings | Medium: Due to loose (unbound) state of NPs used in water treatment application (hypothetical at this stage of innovation). Cannot rule out that NPs will not be released from water treatment application | Medium: Due to loose (unbound) state of NPs used in water treatment application (hypothetical at this stage of innovation). Cannot rule out that NPs will not be released from water treatment application | Medium: Conflicting findings; from no/low toxicity <sup>51, 52</sup> to neuronal developmental toxicity, behavioral changes, impacts on reproduction, and some cytotoxicity and genotoxicity <sup>53-55</sup> ; Bulk ZrO <sub>2</sub> may cause irritation (eyes, skin, ingestion, inhalation) <sup>56</sup> | Low: No ecotoxicity effects reports; not considered to be persistent, bioaccumulative, or toxic <sup>56-58</sup>                                                    |

Table S-6. Detailed results from LICARA nanoSCAN applied to ENMs in case study. ENM = engineered nanomaterial; NP = nanoparticle; NA = not available or applicable. Note: the questions listed below are slightly abbreviated questions from the LICARA nanoSCAN methodology for brevity reasons.

|        |                                     | LICARA nanoSCAN questions                                                                            | Al                                                                                                                             | Al <sub>2</sub> O <sub>3</sub>      | CuO                                            | Fe <sub>2</sub> O <sub>3</sub>      | MgO                                              | MnO <sub>2</sub>                    | TiO <sub>2</sub>                    | ZrO <sub>2</sub>                                    |                                     |                                     |
|--------|-------------------------------------|------------------------------------------------------------------------------------------------------|--------------------------------------------------------------------------------------------------------------------------------|-------------------------------------|------------------------------------------------|-------------------------------------|--------------------------------------------------|-------------------------------------|-------------------------------------|-----------------------------------------------------|-------------------------------------|-------------------------------------|
| Box 1. | Box 0. Nano product and legislation | Type of ENM and application                                                                          | 0.1. Which ENM will be used? Please specify additional ENM subtype or indications / properties:                                | Other; Al NP; 60-80nm               | Other; Al <sub>2</sub> O <sub>3</sub> NP; 60nm | Other; CuO NP; 30-50nm              | Iron NPs; Fe <sub>2</sub> O <sub>3</sub> NP; 3nm | Other; MgO NP; 100nm                | Other; MnO <sub>2</sub> NP; 50nm    | Titanium dioxide (TiO <sub>2</sub> ); anatase, 15nm | Other; ZrO <sub>2</sub> NP; <100 nm |                                     |
|        |                                     |                                                                                                      | 0.2. In which type of application is the ENM used?                                                                             | Water / waste water treatment       | Water / waste water treatment                  | Water / waste water treatment       | Water / waste water treatment                    | Water / waste water treatment       | Water / waste water treatment       | Water / waste water treatment                       | Water / waste water treatment       |                                     |
|        |                                     |                                                                                                      | 0.3a. Is this a completely new product with a new functionality?<br>0.3b. If not, what conventional product is being replaced? | No                                  | No                                             | No                                  | No                                               | No                                  | No                                  | No                                                  | No                                  | No                                  |
|        |                                     |                                                                                                      | 0.4. The product under evaluation is: (for consumer use, for professional use, etc.)                                           | Professional market only            | Professional market only                       | Professional market only            | Professional market only                         | Professional market only            | Professional market only            | Professional market only                            | Professional market only            | Professional market only            |
|        |                                     |                                                                                                      | 0.5. What is the main function that the ENM provides?                                                                          | Water treatment ; phosphate removal | Water treatment ; phosphate removal            | Water treatment ; phosphate removal | Water treatment ; phosphate removal              | Water treatment ; phosphate removal | Water treatment ; phosphate removal | Water treatment ; phosphate removal                 | Water treatment ; phosphate removal | Water treatment ; phosphate removal |
|        |                                     |                                                                                                      | 0.6. What is the appropriate unit to compare the nanoparticle with the conventional product?                                   | 1kg                                 | 1kg                                            | 1kg                                 | 1kg                                              | 1kg                                 | 1kg                                 | 1kg                                                 | 1kg                                 | 1kg                                 |
|        | Nano-relevance                      | 0.7. Approach 1 (precautionary approach): Ranges of sizes of primary particles contained in the ENM? | 1-500nm                                                                                                                        | 1-500nm                             | 1-500nm                                        | 1-500nm                             | 1-500nm                                          | 1-500nm                             | 1-500nm                             | 1-500nm                                             | 1-500nm                             |                                     |
|        |                                     | 0.8. Approach 2 (EU-proposed definition 2011/696/EU)                                                 | Yes                                                                                                                            | Yes                                 | Yes                                            | Yes                                 | Yes                                              | Yes                                 | Yes                                 | Yes                                                 | Yes                                 |                                     |
|        | Legislation                         | 0.9. Are you aware of existing legislation (e.g. EU REACH)                                           | Yes                                                                                                                            | Yes                                 | Yes                                            | Yes                                 | Yes                                              | Yes                                 | Yes                                 | Yes                                                 | Yes                                 |                                     |
|        |                                     | 0.10. Is your ENM approved or notified according to relevant EU-legislation (e.g. EU REACH)          | Yes                                                                                                                            | Yes                                 | Yes                                            | Yes                                 | Yes                                              | Yes                                 | Yes                                 | Yes                                                 | Yes                                 |                                     |
|        |                                     | 0.11. Do you use the ENM below its specific concentration limits recommended in the legal framework? | Yes                                                                                                                            | Yes                                 | Yes                                            | Yes                                 | Yes                                              | Yes                                 | Yes                                 | Yes                                                 | Yes                                 |                                     |
| Box 1. | Main activity                       | 1.1. Energy consumption of manufacturing process?                                                    | Worse <sup>59,60</sup>                                                                                                         | Worse <sup>59,60</sup>              | Worse <sup>59,60</sup>                         | Worse <sup>59,60</sup>              | Worse <sup>59,60</sup>                           | Better, as NPs                      | Worse <sup>59,60</sup>              | Worse <sup>59,60</sup>                              |                                     |                                     |

| LICARA nanoSCAN questions |           | Al                                                                                                                                                                                                                                                                                                                                         | Al <sub>2</sub> O <sub>3</sub>              | CuO                                         | Fe <sub>2</sub> O <sub>3</sub>              | MgO                                         | MnO <sub>2</sub>                            | TiO <sub>2</sub>                                                     | ZrO <sub>2</sub>                            |                                             |
|---------------------------|-----------|--------------------------------------------------------------------------------------------------------------------------------------------------------------------------------------------------------------------------------------------------------------------------------------------------------------------------------------------|---------------------------------------------|---------------------------------------------|---------------------------------------------|---------------------------------------------|---------------------------------------------|----------------------------------------------------------------------|---------------------------------------------|---------------------------------------------|
| Envi<br>ron<br>me         | phase     | Note: conservative potential proxies (macro/micro scale powders) were used to check if energy use were worse for the ENMs than activated carbon                                                                                                                                                                                            |                                             |                                             |                                             |                                             | grown on non-woven fibers                   |                                                                      |                                             |                                             |
|                           |           | 1.2a. Materials consumption in manufacturing process?<br>1.2b. Amounts of hazardous substances used in manufacturing?                                                                                                                                                                                                                      | Worse;<br>Worse <sup>59,60</sup>            | Better, as NPs grown on non-woven fibers;<br>Unknown                 | Worse;<br>Worse <sup>59,60</sup>            | Worse;<br>Worse <sup>59,60</sup>            |
|                           |           | 1.3. Efforts needed to produce product using the ENM?                                                                                                                                                                                                                                                                                      | Worse <sup>59,60</sup>                      | Better, as NPs grown on non-woven fibers                             | Worse <sup>59,60</sup>                      | Worse <sup>59,60</sup>                      |
|                           |           | 1.4a. Amount of solid waste from manufacturing process?<br>1.4b. Amount of wastewater from manufacturing process?<br>1.4c. Emissions to air or (waste)water from manufacturing process?<br>Note: conservative potential proxies (macro/micro scale powders) were used to check if energy use were worse for the ENMs than activated carbon | Worse;<br>Worse;<br>Worse <sup>59,60</sup>  | Better, as NPs grown on non-woven fibers;<br>Unknown<br>;<br>Unknown | Worse;<br>Worse;<br>Worse <sup>59,60</sup>  | Worse;<br>Worse;<br>Worse <sup>59,60</sup>  |
|                           |           | 1.5. Product lifetime (use phase)?                                                                                                                                                                                                                                                                                                         | Better, assumed from research team                                   | Better, assumed from research team          | Better, assumed from research team          |
|                           | Use phase | 1.6a. Need for maintenance?<br>1.6b. Amounts of hazardous substances used in maintenance?                                                                                                                                                                                                                                                  | Equal;<br>Equal, assumed from research team                          | Equal;<br>Equal, assumed from research team | Equal;<br>Equal, assumed from research team |
|                           |           | 1.7a. Amounts of hazardous substances used in maintenance?<br>1.7b. Amount of solid waste from using                                                                                                                                                                                                                                       | Equal;<br>Equal;<br>Unknown,                | Equal;<br>Equal;<br>Unknown,                | Equal;<br>Equal;<br>Unknown,                | Equal;<br>Equal;<br>Unknown,                | Equal;<br>Equal;<br>Unknown,                | Equal;<br>Unknown<br>;                                               | Equal;<br>Equal;<br>Unknown,                | Equal;<br>Equal;<br>Unknown,                |

| LICARA nanoSCAN questions |                                                                                                                                                                | Al                                                                               | Al <sub>2</sub> O <sub>3</sub>                                                  | CuO                                                                             | Fe <sub>2</sub> O <sub>3</sub>                                                  | MgO                                                                             | MnO <sub>2</sub>                                                                | TiO <sub>2</sub>                                                                | ZrO <sub>2</sub>                                                                |                                        |
|---------------------------|----------------------------------------------------------------------------------------------------------------------------------------------------------------|----------------------------------------------------------------------------------|---------------------------------------------------------------------------------|---------------------------------------------------------------------------------|---------------------------------------------------------------------------------|---------------------------------------------------------------------------------|---------------------------------------------------------------------------------|---------------------------------------------------------------------------------|---------------------------------------------------------------------------------|----------------------------------------|
| End-of-life               | product?<br>1.7c. Amount of wastewater resulting from use of product?                                                                                          | assumed from research team                                                       | assumed from research team                                                      | assumed from research team                                                      | assumed from research team                                                      | assumed from research team                                                      | Unknown, assumed from research team                                             | assumed from research team                                                      | assumed from research team                                                      |                                        |
|                           | 1.8. Efficiency of use?                                                                                                                                        | Better, as NPs are often reported to be more reactive than bulk scale materials  | Better, as NPs are often reported to be more reactive than bulk scale materials | Better, as NPs are often reported to be more reactive than bulk scale materials | Better, as NPs are often reported to be more reactive than bulk scale materials | Better, as NPs are often reported to be more reactive than bulk scale materials | Better, as NPs are often reported to be more reactive than bulk scale materials | Better, as NPs are often reported to be more reactive than bulk scale materials | Better, as NPs are often reported to be more reactive than bulk scale materials |                                        |
|                           | 1.9. Volume of waste?                                                                                                                                          | Equal, assumed from research team                                                | Equal, assumed from research team                                               | Equal, assumed from research team                                               | Equal, assumed from research team                                               | Equal, assumed from research team                                               | Equal, assumed from research team                                               | Equal, assumed from research team                                               | Equal, assumed from research team                                               |                                        |
|                           | 1.10a. Amounts of other hazardous substances released from wastewater treatment?<br>1.10b. Amounts of other hazardous substances released during incineration? | Unknown ; Unknown                                                                | Unknown ; Unknown                                                               | Unknown ; Unknown                                                               | Unknown ; Unknown                                                               | Unknown ; Unknown                                                               | Unknown ; Unknown                                                               | Unknown ; Unknown                                                               | Unknown ; Unknown                                                               |                                        |
|                           | 1.11. Established recycling systems exposed to the ENM in the product?                                                                                         | Equal; this is expected to be a minor issue for both the NP and activated carbon | Equal; this is expected to be a minor issue for both the NP and activated       | Equal; this is expected to be a minor issue for both the NP and activated       | Equal; this is expected to be a minor issue for both the NP and activated       | Equal; this is expected to be a minor issue for both the NP and activated       | Equal; this is expected to be a minor issue for both the NP and activated       | Equal; this is expected to be a minor issue for both the NP and activated       | Equal; this is expected to be a minor issue for both the NP and activated       |                                        |
|                           | 1.12a. Can the wastewater treatment facility eliminate the nanoprodukt's emissions?<br>1.12b. Can the waste incineration facility eliminate the nanoprodukt's  | No <sup>61, 62</sup> ;<br>No <sup>63</sup>                                       | No <sup>64</sup> ;<br>No <sup>63</sup>                                          | No <sup>64</sup> ;<br>No <sup>63</sup>                                          | No <sup>64</sup> ;<br>No <sup>63</sup>                                          | No <sup>64</sup> ;<br>No <sup>63</sup>                                          | No <sup>64</sup> ;<br>No <sup>63</sup>                                          | No <sup>64</sup> ;<br>No <sup>63</sup>                                          | No <sup>61, 65</sup> ;<br>No <sup>63, 66</sup>                                  | No <sup>61</sup> ;<br>No <sup>63</sup> |

| LICARA nanoSCAN questions                                                             |                               | Al                                                                                                                                                                    | Al <sub>2</sub> O <sub>3</sub>                                                      | CuO                                                                                 | Fe <sub>2</sub> O <sub>3</sub>                                                      | MgO                                                                                 | MnO <sub>2</sub>                                                                    | TiO <sub>2</sub>                                                                    | ZrO <sub>2</sub>                                                                    |                                   |
|---------------------------------------------------------------------------------------|-------------------------------|-----------------------------------------------------------------------------------------------------------------------------------------------------------------------|-------------------------------------------------------------------------------------|-------------------------------------------------------------------------------------|-------------------------------------------------------------------------------------|-------------------------------------------------------------------------------------|-------------------------------------------------------------------------------------|-------------------------------------------------------------------------------------|-------------------------------------------------------------------------------------|-----------------------------------|
| Box 2. Economic benefits                                                              | Market potential              | emissions?                                                                                                                                                            |                                                                                     |                                                                                     |                                                                                     |                                                                                     |                                                                                     |                                                                                     |                                                                                     |                                   |
|                                                                                       |                               | 2.1. Does the nanoproduct have increased marketability due to an improved or new functionality or a clear image advantage compared to conventional product?           | Equal, based on current knowledge                                                   | Equal, based on current knowledge |
|                                                                                       | Profitability                 | 2.2. What is the foreseen market potential of nanoproduct or - application in Europe?                                                                                 | Unknown                                                                             | Unknown                           |
|                                                                                       |                               | 2.3. What is the purchase price per unit of the nanobased product or material compared to the conventional one?                                                       | Higher (see Table S-1)                                                              | Higher (see Table S-1)            |
|                                                                                       | Development stage             | 2.4. What are the operational costs during the use phase of the nanobased product or application compared to the conventional one?                                    | Equal, assumed from research team                                                   | Equal, assumed from research team |
| 2.5. What is the time-to-market to manufacture the nanoproduct on a commercial scale? |                               | Medium (1- <5 year)                                                                                                                                                   | Medium (1- <5 year)                                                                 | Medium (1- <5 year)                                                                 | Medium (1- <5 year)                                                                 | Medium (1- <5 year)                                                                 | Medium (1- <5 year)                                                                 | Medium (1- <5 year)                                                                 | Medium (1- <5 year)                                                                 |                                   |
| Box 3. Societal benefits                                                              | Technological break-through   | 3.1. Could the use or application of nanoproduct be considered a technological breakthrough compared to conventional alternative?                                     | Yes; improved phosphate adsorption capacity compared to activated carbon (1-2 mg/g) | Yes; improved phosphate adsorption capacity compared to activated carbon (1-2 mg/g) | Yes; improved phosphate adsorption capacity compared to activated carbon (1-2 mg/g) | Yes; improved phosphate adsorption capacity compared to activated carbon (1-2 mg/g) | Yes; improved phosphate adsorption capacity compared to activated carbon (1-2 mg/g) | Yes; improved phosphate adsorption capacity compared to activated carbon (1-2 mg/g) | Yes; improved phosphate adsorption capacity compared to activated carbon (1-2 mg/g) |                                   |
|                                                                                       | Highly qualified labour force | 3.2. Does production of the application lead to a substantial improvement in the development of a highly qualified labour force compared to conventional alternative? | More or less equal                                                                  |                                   |

| LICARA nanoSCAN questions                  |                                           |                                                                                                                                                                                                                                                             | Al                                                               | Al <sub>2</sub> O <sub>3</sub>                                   | CuO                                                              | Fe <sub>2</sub> O <sub>3</sub>                                   | MgO                                                              | MnO <sub>2</sub>                                                 | TiO <sub>2</sub>                                                 | ZrO <sub>2</sub>                                                 |                                                  |
|--------------------------------------------|-------------------------------------------|-------------------------------------------------------------------------------------------------------------------------------------------------------------------------------------------------------------------------------------------------------------|------------------------------------------------------------------|------------------------------------------------------------------|------------------------------------------------------------------|------------------------------------------------------------------|------------------------------------------------------------------|------------------------------------------------------------------|------------------------------------------------------------------|------------------------------------------------------------------|--------------------------------------------------|
| Box 4. Public health & environmental risks | Improving global health or food situation | 3.3. Compared to conventional alternative... OR Does the use or application of nano-based product lead to improvements in people's health, particularly the direct user, e.g. by improvements in water purity, sanitation or medicines and pharmaceuticals? | Yes, case study focused on sustainable water treatment solutions | Yes, case study focused on sustainable water treatment solutions | Yes, case study focused on sustainable water treatment solutions | Yes, case study focused on sustainable water treatment solutions | Yes, case study focused on sustainable water treatment solutions | Yes, case study focused on sustainable water treatment solutions | Yes, case study focused on sustainable water treatment solutions | Yes, case study focused on sustainable water treatment solutions |                                                  |
|                                            | System knowledge                          | 4.1. Is the origin of the (ENM) starting materials known?                                                                                                                                                                                                   | Yes (see Table S-1)                                              | Yes (see Table S-1)                              |
|                                            |                                           | 4.2. Are the next users of the ENM known?                                                                                                                                                                                                                   | Yes                                                              | Yes                                              |
|                                            |                                           | 4.3. How accurately is material system known or can disturbing factors (e.g. impurities) be estimated?                                                                                                                                                      | Not accurately, still in early innovation stages                 | Not accurately, still in early innovation stages |
|                                            | Potential effect                          | 4.4. Do the ENMs cause redox activity, catalytic activity or have a potential for oxygen radical formation or to induce inflammation reactions?                                                                                                             | Medium <sup>18, 19</sup>                                         | Medium <sup>22</sup>                                             | High <sup>28, 29</sup>                                           | High <sup>38</sup>                                               | High <sup>43</sup>                                               | Medium <sup>67</sup>                                             | High <sup>47</sup>                                               | Low <sup>53, 56</sup>                                            |                                                  |
|                                            |                                           | 4.5. What is stability (half-life) of NPs present in the ENM under ambient environmental conditions?                                                                                                                                                        | Months, given its water solubility not determined <sup>18</sup>  | Months, given its insolubility in water <sup>68</sup>            | Months, given its insolubility in water <sup>69</sup>            | Months, given its insolubility in water <sup>70</sup>            | Months, given it is slightly soluble in water <sup>71</sup>      | Months, given its insolubility in water <sup>1</sup>             | Months, given its insolubility in water <sup>72</sup>            | Months, given its water solubility = 0.1 g/L <sup>73</sup>       |                                                  |
|                                            | Potential input into environment          | 4.6. What is annual quantity of NPs from the manufacturing phase that reaches the environment via wastewater, exhaust gases or solid waste?                                                                                                                 | <5kg (see Table S-1)                                             | <5kg (see Table S-1)                             |
|                                            |                                           | 4.7. What is the physical surrounding or carrier material of NPs in the product during the use phase?                                                                                                                                                       | Liquid media                                                     | Solid matrix, not stable under conditions of use                 | Liquid media                                                     | Liquid media                                                     |                                                  |

| LICARA nanoSCAN questions    |                                                 |                                                                                                                                                                                | Al                                          | Al <sub>2</sub> O <sub>3</sub>              | CuO                                         | Fe <sub>2</sub> O <sub>3</sub>              | MgO                                         | MnO <sub>2</sub>                            | TiO <sub>2</sub>                            | ZrO <sub>2</sub>                            |
|------------------------------|-------------------------------------------------|--------------------------------------------------------------------------------------------------------------------------------------------------------------------------------|---------------------------------------------|---------------------------------------------|---------------------------------------------|---------------------------------------------|---------------------------------------------|---------------------------------------------|---------------------------------------------|---------------------------------------------|
|                              |                                                 | 4.8. What is the annual quantity of NPs in products that reaches from production or use phase the environment via utility products, waste water, exhaust gases or solid waste? | <5kg (see Table S-1)                        |
|                              |                                                 | 4.9. What is the annual quantity of disposed ENM (from the production or use phase)?                                                                                           | <5kg (see Table S-1)                        |
| Box 5. Occupational health   | Stoffenmanager Nano 1.0                         | Hazard & exposure during:<br>5.1a. Manufacture of ENM<br>5.1b. Processing of ENM<br>5.1c. Application of nanoproduct                                                           | B1 (see Table S-7)                          | C1 (see Table S-7)                          | D1 (see Table S-7)                          | B1 (see Table S-6)                          |
| Box 6. Consumer health risks | Hazard & exposure by consumers during use phase | 6.1. At what location is the nanoelement situated in the article or the product?                                                                                               | NA:<br>Product for professional market only |
|                              |                                                 | 6.2. What is the size of the consumer population using the nanoproduct and hence which may be exposed?                                                                         | NA:<br>Product for professional market only |

Table S-7. Detailed results from Stoffenmanager 1.0 applied to ENMs in case study relevant for occupational risks (Box 5 of LICARA nanoSCAN). Details shown in table reflect generated output from Stoffenmanager 1.0, and some questions/responses are slightly abbreviated for brevity reasons. ENM = engineered nanomaterial; NP = nanoparticle; NA = not available or applicable.

| Stoffenmanager questions |                                   | Al                              | Al <sub>2</sub> O <sub>3</sub>       | CuO                             | Fe <sub>2</sub> O <sub>3</sub>       | MgO                           | MnO <sub>2</sub>                | TiO <sub>2</sub>                              | ZrO <sub>2</sub>                           |                           |
|--------------------------|-----------------------------------|---------------------------------|--------------------------------------|---------------------------------|--------------------------------------|-------------------------------|---------------------------------|-----------------------------------------------|--------------------------------------------|---------------------------|
| General data             | Product                           | Al water                        | Al <sub>2</sub> O <sub>3</sub> water | CuO water                       | Fe <sub>2</sub> O <sub>3</sub> water | MgO water                     | MnO <sub>2</sub> water          | TiO <sub>2</sub> water                        | ZrO <sub>2</sub> water                     |                           |
|                          | NP                                | Al                              | Al <sub>2</sub> O <sub>3</sub>       | CuO                             | Fe <sub>2</sub> O <sub>3</sub>       | MgO                           | MnO <sub>2</sub>                | TiO <sub>2</sub>                              | ZrO <sub>2</sub>                           |                           |
|                          | Concentration of NP in product    | 50-99% (based on supplier info) | 50-99% (based on supplier info)      | 50-99% (based on supplier info) | 99% (based on supplier info)         | 100% (based on supplier info) | 50-99% (based on supplier info) | 99.97% (based on supplier info)               | 100% (based on supplier info)              |                           |
|                          | Name risk assessment              | Al NP                           | Al <sub>2</sub> O <sub>3</sub> NP    | MgO NP                          | Fe <sub>2</sub> O <sub>3</sub> NP    | MgO NP                        | MnO <sub>2</sub> NP             | TiO <sub>2</sub> NP                           | ZrO <sub>2</sub> NP                        |                           |
| Result risk assessment   | Hazard class                      | B                               | B                                    | B                               | B                                    | B                             | C                               | D                                             | B                                          |                           |
|                          | Exposure class                    | 1                               | 1                                    | 1                               | 1                                    | 1                             | 1                               | 1                                             | 1                                          |                           |
|                          | Risk score                        | III                             | III                                  | III                             | III                                  | III                           | III                             | II                                            | III                                        |                           |
| Question                 | Entered data                      | Handling of NP                  | Handling of NP                       | Handling of NP                  | Handling of NP                       | Handling of NP                | Handling of NP                  | Handling of NP                                | Handling of NP                             |                           |
|                          | Source domain                     | NA                              | NA                                   | NA                              | NA                                   | NA                            | NA                              | NA                                            | NA                                         |                           |
|                          | Appearance                        | Powder                          | Powder                               | Powder                          | Powder                               | Powder                        | Powder                          | Powder                                        | Powder                                     |                           |
|                          | Product dustiness                 | Unknown                         | Unknown                              | Unknown                         | Unknown                              | Unknown                       | Unknown                         | Unknown                                       | Unknown                                    |                           |
|                          | Product moisture content          | Dry (< 5% moisture content)     | Dry (< 5% moisture content)          | Dry (< 5% moisture content)     | Dry (< 5% moisture content)          | Dry (< 5% moisture content)   | Dry (< 5% moisture content)     | Dry (< 5% moisture content)                   | Dry (< 5% moisture content)                |                           |
|                          | Dilution                          | NA                              | NA                                   | NA                              | NA                                   | NA                            | NA                              | NA                                            | NA                                         |                           |
|                          | Viscosity                         | NA                              | NA                                   | NA                              | NA                                   | NA                            | NA                              | NA                                            | NA                                         |                           |
|                          | Fibers                            | No                              | No                                   | No                              | No                                   | No                            | No                              | No                                            | No                                         |                           |
|                          | Fiber size                        | No                              | No                                   | No                              | No                                   | No                            | No                              | No                                            | No                                         |                           |
|                          | Hazardous properties              | Harmful and/or irritating       | Harmful and/or irritating            | Harmful and/or irritating       | Harmful and/or irritating            | Harmful and/or irritating     | Harmful and/or irritating       | Toxic, corrosive and/or respiratory allergens | Carcinogenic, reprotoxic and/or very toxic | Harmful and/or irritating |
|                          | NP type                           | NA                              | NA                                   | NA                              | NA                                   | NA                            | NA                              | NA                                            | NA                                         | NA                        |
|                          | No. employees that can be exposed | 3                               | 3                                    | 3                               | 3                                    | 3                             | 3                               | 3                                             | 3                                          | 3                         |
| Production or usage      | 1                                 | 1                               | 1                                    | 1                               | 1                                    | 1                             | 1                               | 1                                             | 1                                          |                           |



| Stoffenmanager questions      |                                            | Al                                                                        | Al <sub>2</sub> O <sub>3</sub>                                            | CuO                                                                       | Fe <sub>2</sub> O <sub>3</sub>                                            | MgO                                                                       | MnO <sub>2</sub>                                                          | TiO <sub>2</sub>                                                          | ZrO <sub>2</sub>                                                          |
|-------------------------------|--------------------------------------------|---------------------------------------------------------------------------|---------------------------------------------------------------------------|---------------------------------------------------------------------------|---------------------------------------------------------------------------|---------------------------------------------------------------------------|---------------------------------------------------------------------------|---------------------------------------------------------------------------|---------------------------------------------------------------------------|
|                               | <b>volume</b>                              |                                                                           |                                                                           |                                                                           |                                                                           |                                                                           |                                                                           |                                                                           |                                                                           |
|                               | <b>Start date of product work period</b>   | 8/1/2017                                                                  | 8/1/2017                                                                  | 8/1/2017                                                                  | 8/1/2017                                                                  | 8/1/2017                                                                  | 8/1/2017                                                                  | 8/1/2017                                                                  | 8/1/2017                                                                  |
|                               | <b>End data of product work period</b>     | 8/1/2018                                                                  | 8/1/2018                                                                  | 8/1/2018                                                                  | 8/1/2018                                                                  | 8/1/2018                                                                  | 8/1/2018                                                                  | 8/1/2018                                                                  | 8/1/2018                                                                  |
|                               | <b>Actualisation date</b>                  | NA                                                                        |
| <b>Task</b>                   | <b>Task</b>                                | Handling small amts (up to 100 g) or low quantities likely to be released | Handling small amts (up to 100 g) or low quantities likely to be released | Handling small amts (up to 100 g) or low quantities likely to be released | Handling small amts (up to 100 g) or low quantities likely to be released | Handling small amts (up to 100 g) or low quantities likely to be released | Handling small amts (up to 100 g) or low quantities likely to be released | Handling small amts (up to 100 g) or low quantities likely to be released | Handling small amts (up to 100 g) or low quantities likely to be released |
|                               | <b>Duration of task</b>                    | 1-30 min/day                                                              |
|                               | <b>Frequency of task</b>                   | ~1day/2wks                                                                |
|                               | <b>Task in breathing zone</b>              | No                                                                        |
|                               | <b>Multiple employees</b>                  | Yes                                                                       |
|                               | <b>Regular cleaning of working room</b>    | Yes                                                                       |
|                               | <b>Regular inspections and maintenance</b> | Yes                                                                       |
|                               | <b>Control measures at source</b>          | Local exhaust ventilation                                                 |
|                               | <b>Segregation of employee</b>             | Mechanical and/or natural ventilation                                     |
| <b>Protection of employee</b> | Filter mask P2                             | Filter mask P2                                                            | Filter mask P2                                                            | Filter mask P2                                                            | Filter mask P2                                                            | Filter mask P2                                                            | Filter mask P2                                                            | Filter mask P2                                                            |                                                                           |

Table S-8. Detailed results from NanoGRID applied to ENMs in case study. ENM = engineered nanomaterial; NP = nanoparticle; NA = not available or applicable. Note: the questions listed below are slightly abbreviated questions from the NanoGRID methodology for brevity reasons.

| NanoGRID questions                |                                | Al                                              | Al <sub>2</sub> O <sub>3</sub>          | CuO                                            | Fe <sub>2</sub> O <sub>3</sub>     | MgO                                            | MnO <sub>2</sub>                   | TiO <sub>2</sub>                                                                | ZrO <sub>2</sub>                                |                                                               |
|-----------------------------------|--------------------------------|-------------------------------------------------|-----------------------------------------|------------------------------------------------|------------------------------------|------------------------------------------------|------------------------------------|---------------------------------------------------------------------------------|-------------------------------------------------|---------------------------------------------------------------|
| <b>Tier 1. Screening criteria</b> | <b>1.1.1 Basic information</b> | Name of ENM-enabled product                     | Al water treatment                      | Al <sub>2</sub> O <sub>3</sub> water treatment | CuO water treatment                | Fe <sub>2</sub> O <sub>3</sub> water treatment | MgO water treatment                | MnO <sub>2</sub> water treatment                                                | TiO <sub>2</sub> water treatment                | ZrO <sub>2</sub> water treatment                              |
|                                   |                                | ENM chemical composition                        | Al                                      | Al <sub>2</sub> O <sub>3</sub>                 | CuO                                | Fe <sub>2</sub> O <sub>3</sub>                 | MgO                                | MnO <sub>2</sub>                                                                | TiO <sub>2</sub>                                | ZrO <sub>2</sub>                                              |
|                                   |                                | Commercial name of product                      | Aluminum powder, spherical, APS 60-80nm | Aluminum oxide, 99.9%                          | Copper (II) oxide, nanopowder      | Iron (III) oxide, nanopowder, 99.95%           | Magnesium oxide, nanopowder, 99+%  | Manganese dioxide MnO <sub>2</sub> nanoparticles (MnO <sub>2</sub> , 98%, 50nm) | Titanium (IV) oxide, anatase, nanopowder, 99.7% | Zirconium (IV) oxide, nanopowder, <100 nm particle size (TEM) |
|                                   |                                | Stage of development                            | Lab scale                               | Lab scale                                      | Lab scale                          | Lab scale                                      | Lab scale                          | Lab scale                                                                       | Lab scale                                       | Lab scale                                                     |
|                                   |                                | Vendor, if ENM purchased                        | Alfa Aesar                              | Alfa Aesar                                     | Alfa Aesar                         | Alfa Aesar                                     | Alfa Aesar                         | NPs synthesized in NC State lab (grown on nanofibrous filter media)             | Alfa Aesar                                      | Sigma-Aldrich                                                 |
|                                   |                                | Manufacturer                                    | Vendor                                  | Vendor                                         | Vendor                             | Vendor                                         | Vendor                             | NA                                                                              | Vendor                                          | Vendor                                                        |
|                                   |                                | Primary use of ENM                              | Absorbant                               | Absorbant                                      | Absorbant                          | Absorbant                                      | Absorbant                          | Absorbant                                                                       | Absorbant                                       | Absorbant                                                     |
|                                   |                                | Purpose of manufacturing material in nano-scale | Increased surface area, reactivity      | Increased surface area, reactivity             | Increased surface area, reactivity | Increased surface area, reactivity             | Increased surface area, reactivity | Increased surface area, reactivity                                              | Increased surface area, reactivity              | Increased surface area, reactivity                            |
|                                   |                                | Multiple types of ENMs?                         | No                                      | No                                             | No                                 | No                                             | No                                 | No                                                                              | No                                              | No                                                            |
|                                   |                                | List other types of ENMs                        | NA                                      | NA                                             | NA                                 | NA                                             | NA                                 | NA                                                                              | NA                                              | NA                                                            |

| NanoGRID questions |                                                 | Al                                              | Al <sub>2</sub> O <sub>3</sub>            | CuO                                       | Fe <sub>2</sub> O <sub>3</sub>            | MgO                                             | MnO <sub>2</sub>                                | TiO <sub>2</sub>                                | ZrO <sub>2</sub> |
|--------------------|-------------------------------------------------|-------------------------------------------------|-------------------------------------------|-------------------------------------------|-------------------------------------------|-------------------------------------------------|-------------------------------------------------|-------------------------------------------------|------------------|
|                    | Test these separately?                          | No                                              | No                                        | No                                        | No                                        | No                                              | No                                              | No                                              | No               |
|                    | Rationale for not testing all ENMs              | Outside scope                                   | Outside scope                             | Outside scope                             | Outside scope                             | Outside scope                                   | Outside scope                                   | Outside scope                                   | Outside scope    |
|                    | <b>1.1.2 Technical questions</b>                |                                                 |                                           |                                           |                                           |                                                 |                                                 |                                                 |                  |
|                    | ENM particulate or part of structure?           | NP                                              | NP                                        | NP                                        | NP                                        | NP                                              | NP                                              | NP                                              | NP               |
|                    | List all similar materials                      | NA                                              | NA                                        | NA                                        | NA                                        | NA                                              | NA                                              | NA                                              | NA               |
|                    | ENM received as dry powder or wet suspension?   | Dry powder                                      | Dry powder                                | Dry powder                                | Dry powder                                | Dry powder                                      | NPs grown on nanofibrous filter media           | Dry powder                                      | Dry powder       |
|                    | If "Other," describe                            | NA                                              | NA                                        | NA                                        | NA                                        | NA                                              | NA                                              | NA                                              | NA               |
|                    | Size of ENM                                     | 60-80nm                                         | 60nm                                      | 30-50nm                                   | 3nm                                       | 100nm                                           | 50nm                                            | 15nm                                            | <100nm           |
|                    | Shape of ENM                                    | Sphere                                          | Sphere                                    | Sphere                                    | Sphere                                    | Sphere                                          | Sphere                                          | Sphere                                          | Sphere           |
|                    | Chemical composition of ENM                     | Al                                              | Al <sub>2</sub> O <sub>3</sub>            | CuO                                       | Fe <sub>2</sub> O <sub>3</sub>            | MgO                                             | MnO <sub>2</sub>                                | TiO <sub>2</sub>                                | ZrO <sub>2</sub> |
|                    | Multiple chemical components ?                  | No                                              | No                                        | No                                        | No                                        | No                                              | No                                              | No                                              | No               |
|                    | Other chemical components                       | No                                              | No                                        | No                                        | No                                        | No                                              | No                                              | No                                              | No               |
| Describe product   | Water treatment application that involves water | Water treatment application that involves water | Water treatment application that involves water | Water treatment application that involves water | Water treatment application that involves water |                  |

| NanoGRID questions               |                                                   |                                                              | Al                                                                | Al <sub>2</sub> O <sub>3</sub>                                    | CuO                                                               | Fe <sub>2</sub> O <sub>3</sub>                                    | MgO                                                               | MnO <sub>2</sub>                                                  | TiO <sub>2</sub>                                                  | ZrO <sub>2</sub>                                                  |
|----------------------------------|---------------------------------------------------|--------------------------------------------------------------|-------------------------------------------------------------------|-------------------------------------------------------------------|-------------------------------------------------------------------|-------------------------------------------------------------------|-------------------------------------------------------------------|-------------------------------------------------------------------|-------------------------------------------------------------------|-------------------------------------------------------------------|
|                                  |                                                   |                                                              | flowing through ENMs in closed container                          | flowing through ENMs in closed container                          | water flowing through ENMs in closed container                    | water flowing through ENMs in closed container                    | water flowing through ENMs in closed container                    | flowing through ENMs in closed container                          | flowing through ENMs in closed container                          | flowing through ENMs in closed container                          |
|                                  | <b>1.2 Technology category</b>                    | Select location of ENM <sup>4</sup>                          | Category 3B. Fluid Suspended Nano-Object, 3-D structure           | Category 3A. Surface Bound Nano-Object, 3-D structure             | Category 3B. Fluid Suspended Nano-Object, 3-D structure           | Category 3B. Fluid Suspended Nano-Object, 3-D structure           |
|                                  | <b>1.3 ENM definition</b>                         | Select best ENM definition <sup>74-76</sup>                  | US EPA TSCA Section 8, and/or EU 2011 definition <sup>75,76</sup> | US EPA TSCA Section 8, and/or EU 2011 definition <sup>75,76</sup> | US EPA TSCA Section 8, and/or EU 2011 definition <sup>75,76</sup> | US EPA TSCA Section 8, and/or EU 2011 definition <sup>75,76</sup> | US EPA TSCA Section 8, and/or EU 2011 definition <sup>75,76</sup> | US EPA TSCA Section 8, and/or EU 2011 definition <sup>75,76</sup> | US EPA TSCA Section 8, and/or EU 2011 definition <sup>75,76</sup> | US EPA TSCA Section 8, and/or EU 2011 definition <sup>75,76</sup> |
|                                  | <b>Tier 1 Conclusion</b>                          |                                                              | Proceed to Tier 2                                                 |
| <b>Tier 2. Potential release</b> | <b>2.1 Release Product classification and use</b> | Is ENM a freely dispersed particle (product class 3B or 3D)? | Yes (Category IIIB)                                               | No (Category IIIA)                                                | Yes (Category IIIB)                                               | Yes (Category IIIB)                                               |
|                                  | <b>Conservative release scenario</b>              | Does ENM have known hazard concentrations?                   | Yes                                                               |
|                                  |                                                   | Complete "Hazard                                             | Ok, continue                                                      |

| NanoGRID questions                          |                                                                                  | Al                                                                                                                                                                                                          | Al <sub>2</sub> O <sub>3</sub>                                                                                                                                                                           | CuO                                                                                                                                                                                                                         | Fe <sub>2</sub> O <sub>3</sub>                                                                                                                                                                                             | MgO                                                                                                                                                                                                                                            | MnO <sub>2</sub>                                                                                                                                                                                                              | TiO <sub>2</sub>                                                                                                                                                                                                                  | ZrO <sub>2</sub>                                                                                           |
|---------------------------------------------|----------------------------------------------------------------------------------|-------------------------------------------------------------------------------------------------------------------------------------------------------------------------------------------------------------|----------------------------------------------------------------------------------------------------------------------------------------------------------------------------------------------------------|-----------------------------------------------------------------------------------------------------------------------------------------------------------------------------------------------------------------------------|----------------------------------------------------------------------------------------------------------------------------------------------------------------------------------------------------------------------------|------------------------------------------------------------------------------------------------------------------------------------------------------------------------------------------------------------------------------------------------|-------------------------------------------------------------------------------------------------------------------------------------------------------------------------------------------------------------------------------|-----------------------------------------------------------------------------------------------------------------------------------------------------------------------------------------------------------------------------------|------------------------------------------------------------------------------------------------------------|
|                                             | identification " page                                                            |                                                                                                                                                                                                             |                                                                                                                                                                                                          |                                                                                                                                                                                                                             |                                                                                                                                                                                                                            |                                                                                                                                                                                                                                                |                                                                                                                                                                                                                               |                                                                                                                                                                                                                                   |                                                                                                            |
|                                             | If 100% of ENM in product were released, would it be below screening thresholds? | No                                                                                                                                                                                                          | No                                                                                                                                                                                                       | No                                                                                                                                                                                                                          | No                                                                                                                                                                                                                         | No                                                                                                                                                                                                                                             | Yes                                                                                                                                                                                                                           | No                                                                                                                                                                                                                                | No                                                                                                         |
| <b>2.2 Hazard identification</b>            | Relevant hazard values found for ENM?                                            | Yes                                                                                                                                                                                                         | Yes                                                                                                                                                                                                      | Yes                                                                                                                                                                                                                         | Yes                                                                                                                                                                                                                        | Yes                                                                                                                                                                                                                                            | Yes                                                                                                                                                                                                                           | Yes                                                                                                                                                                                                                               | Yes                                                                                                        |
| <b>2.2.1 Environmental hazard screening</b> | PNEC method                                                                      | ECHA method                                                                                                                                                                                                 | ECHA method                                                                                                                                                                                              | ECHA method                                                                                                                                                                                                                 | ECHA method                                                                                                                                                                                                                | ECHA method                                                                                                                                                                                                                                    | ECHA method                                                                                                                                                                                                                   | ECHA method                                                                                                                                                                                                                       | ECHA method                                                                                                |
|                                             | PNEC: Enter <4 effect levels, at least 1 acute or chronic is required            | <p><b>Acute:</b><br/>Species 1: 219000 ppb, LC50, Daphnia, immobilization, 24H<sup>21</sup></p> <p>Species 2: 7483 ppb, LC50, Daphnia, immobilization, 48H<sup>21</sup></p> <p><b>Chronic:</b><br/>None</p> | <p><b>Acute:</b><br/>Species 1: 162392 ppb, LC50, Daphnia, mortality, 48H<sup>26</sup></p> <p>Species 2: 162392 ppb, EC50, Daphnia, Immobilization, 48H<sup>26</sup></p> <p><b>Chronic:</b><br/>None</p> | <p><b>Acute:</b><br/>Species 1: 92700 ppb, EC50, Daphnia, mortality, 48H<sup>77</sup></p> <p>Species 2: 80000 ppb, EC50, Tetrahymena thermophila, 24H, viability (atp content)<sup>78</sup></p> <p>Species 3: 28000ppb,</p> | <p><b>Acute:</b><br/>Species 1: 36060 ppb, EC50, Danio rerio, 48H, hatching rate<sup>40</sup></p> <p>Species 2: 53350 ppb, LC50, Danio rerio, 168H mortality<sup>40</sup></p> <p><b>Chronic:</b><br/>Species 1, 100000</p> | <p><b>Acute:</b><br/>Species 1: 174000 ppb, IC50, Hela cells, 72H, cell viability<sup>81</sup></p> <p>Species 2: 240030 ppb, IC50, SNU-16, cell viability<sup>81</sup></p> <p>Species 3: 233330ppb, IC50, AGS, cell viability<sup>81</sup></p> | <p><b>Acute:</b><br/>Species 1: 10000 ppb, EC50, Chlorella Pyrenoidosa, 48H, mortality<sup>46</sup></p> <p>Species 2: 170000 ppb, EC 50, Saccharomyces cerevisiae, oxygen consumption<sup>82</sup></p> <p><b>Chronic:</b></p> | <p><b>Acute:</b><br/>Species 1: 10910 ppb, Phaeodactylum tricornutum, 72H, growth inhibition<sup>48</sup></p> <p>Species 2: 35306 ppb, EC50, Daphnia Magma, 48H, immobilization<sup>26</sup></p> <p>Species 3: 800 ppb, EC50,</p> | <p><b>Acute:</b><br/>Species 1: 10000 ppb, EC50, Saccharomyces cerevisiae, oxygen content<sup>82</sup></p> |

| NanoGRID questions |                                                                   |                                                         | Al    | Al <sub>2</sub> O <sub>3</sub>             | CuO                                                                                 | Fe <sub>2</sub> O <sub>3</sub>                               | MgO                  | MnO <sub>2</sub> | TiO <sub>2</sub>                                                                                                                                                               | ZrO <sub>2</sub> |
|--------------------|-------------------------------------------------------------------|---------------------------------------------------------|-------|--------------------------------------------|-------------------------------------------------------------------------------------|--------------------------------------------------------------|----------------------|------------------|--------------------------------------------------------------------------------------------------------------------------------------------------------------------------------|------------------|
|                    |                                                                   |                                                         |       |                                            | LC50, Nitellopsis Obtusa, 96H, mortality, <sup>79</sup><br><br><b>Chronic:</b> None | ppb, NOEC, Ceriodaphnia dubia, 48H, mortality, <sup>80</sup> | <b>Chronic:</b> None | None             | Daphnia Magma, 48H, mortality <sup>83</sup><br><br><b>Chronic:</b> Species 1: NOEC, Cyprinus carpio, mortality <sup>84</sup><br><br>Species 2: NOEC, Danio rerio <sup>85</sup> |                  |
|                    |                                                                   | Calculated PNEC from NanoGRID (ppb)                     | 40.41 | 136.27                                     | 59.21                                                                               | 1000                                                         | 213.57               | 41.20            | 20                                                                                                                                                                             | 100              |
|                    |                                                                   | PEC: Model to compute PEC                               | None  | 57,000 ppb (mg/kg), sediment <sup>86</sup> | None                                                                                | 16,000 ppb, sediment (mg/kg) <sup>86</sup>                   | None                 | None             | 65,000 ppb (mg/kg), sediment <sup>87</sup>                                                                                                                                     | None             |
|                    | <b>2.2 Hazard identification</b><br><br><b>2.2.2 Human health</b> | Effect values for:<br>Inhalation<br>Dermal<br>Ingestion | None  | None                                       | None                                                                                | None                                                         | None                 | None             | Inhalation: 5 mg/cm <sup>3</sup><br>Dermal: below detection limit<br>Ingestion: 15 mg/kg                                                                                       | None             |

| NanoGRID questions |                          | Al                                                                                                                                                                   | Al <sub>2</sub> O <sub>3</sub>                                                                                                                                       | CuO                                                                                                                                                                  | Fe <sub>2</sub> O <sub>3</sub>                                                                                                                                       | MgO                                                                                                                                                                  | MnO <sub>2</sub>                                                                                                                     | TiO <sub>2</sub>                                                                                                                                                     | ZrO <sub>2</sub>                                                                                                                                                     |
|--------------------|--------------------------|----------------------------------------------------------------------------------------------------------------------------------------------------------------------|----------------------------------------------------------------------------------------------------------------------------------------------------------------------|----------------------------------------------------------------------------------------------------------------------------------------------------------------------|----------------------------------------------------------------------------------------------------------------------------------------------------------------------|----------------------------------------------------------------------------------------------------------------------------------------------------------------------|--------------------------------------------------------------------------------------------------------------------------------------|----------------------------------------------------------------------------------------------------------------------------------------------------------------------|----------------------------------------------------------------------------------------------------------------------------------------------------------------------|
|                    |                          |                                                                                                                                                                      |                                                                                                                                                                      |                                                                                                                                                                      |                                                                                                                                                                      |                                                                                                                                                                      |                                                                                                                                      | 88                                                                                                                                                                   |                                                                                                                                                                      |
|                    | <b>Tier 2 Conclusion</b> | Proceed to Tier 3. Based on: Unbound, loose NPs; Assume 100% release potential and persistency; Potential risks cannot be dismissed; More information needed on fate | Proceed to Tier 3. Based on: Unbound, loose NPs; Assume 100% release potential and persistency; Potential risks cannot be dismissed; More information needed on fate | Proceed to Tier 3. Based on: Unbound, loose NPs; Assume 100% release potential and persistency; Potential risks cannot be dismissed; More information needed on fate | Proceed to Tier 3. Based on: Unbound, loose NPs; Assume 100% release potential and persistency; Potential risks cannot be dismissed; More information needed on fate | Proceed to Tier 3. Based on: Unbound, loose NPs; Assume 100% release potential and persistency; Potential risks cannot be dismissed; More information needed on fate | Perform ENM release tests, using corrosion- and aqueous-based tests and different aging times to get more information on ENM release | Proceed to Tier 3. Based on: Unbound, loose NPs; Assume 100% release potential and persistency; Potential risks cannot be dismissed; More information needed on fate | Proceed to Tier 3. Based on: Unbound, loose NPs; Assume 100% release potential and persistency; Potential risks cannot be dismissed; More information needed on fate |

Table S-9. Detailed results from NanoGRID applied to MnO<sub>2</sub> NP for release potential (category IIIA, surface bound NP using<sup>4</sup>). Each question is scored from 0 to 5 by the user, where 0 indicates no probability and 5 indicates high probability of occurrence. The Total Release Score (90<sup>th</sup> Percentile) reflects the average score from the associated questions in each category. \*Aging is not well-defined in NanoGRID and no specific release tests are identified; rather the user is recommended to perform several potential ENM release tests over time to characterize aging factors on ENM release.

| Category | Question                                                             | Question Score | Total Release Score (90 <sup>th</sup> Percentile) |
|----------|----------------------------------------------------------------------|----------------|---------------------------------------------------|
| Aqueous  | 1. The material will be immersed in water or be submerged during use | 5              | 3                                                 |

| Category                                                                  | Question                                                                                                                                                                                                             | Question Score | Total Release Score (90 <sup>th</sup> Percentile) |
|---------------------------------------------------------------------------|----------------------------------------------------------------------------------------------------------------------------------------------------------------------------------------------------------------------|----------------|---------------------------------------------------|
|                                                                           | 2. The material will be used in an external setting and have the potential to be rained on                                                                                                                           | 0              |                                                   |
|                                                                           | 3. The material will be used in an environment that is subjected to acid rain                                                                                                                                        | 0              |                                                   |
|                                                                           | 4. The material will be used in an environment that is subjected to large changes in humidity                                                                                                                        | 5              |                                                   |
|                                                                           | 5. The material will be exposed to water periodically via some other means (e.g., washing, rinsing, splashing, etc.)                                                                                                 | 5              |                                                   |
| Ultraviolet                                                               | 6. The material will be used outdoors                                                                                                                                                                                | 0              | 0                                                 |
|                                                                           | 7. The material will be exposed to sunlight or artificial UV light either directly or intermittently                                                                                                                 | 0              |                                                   |
| Thermal                                                                   | 8. The product will be exposed to temperature fluctuations (e.g.-used outdoors and indoors)                                                                                                                          | 3              | 0.8                                               |
|                                                                           | 9. Any process that uses heat (e.g., hot air, sunlight, resistive heating, etc.) to remove liquid from the surface or interior of the product. This includes air dryers, clothes dryers, and other thermal processes | 0              |                                                   |
|                                                                           | 10. The product will experience temperatures exceeding room temperature                                                                                                                                              | 0              |                                                   |
|                                                                           | 11. The product/material will experience temperatures associated with a freezing event                                                                                                                               | 0              |                                                   |
| Mechanical                                                                | 12. Mechanical stress caused by a singular sharp or angular object coming into contact with the surface of the material                                                                                              | 0              | 0.8                                               |
|                                                                           | 13. Mechanical stress caused by intentional abrasion with a sanding or polishing surface (e.g., sandpaper, cloth, etc.)                                                                                              | 0              |                                                   |
|                                                                           | 14. Mechanical stress caused by externally applied force compressing the material                                                                                                                                    | 2              |                                                   |
|                                                                           | 15. Mechanical stress caused by jarring or impact from release of gravitational potential energy (being dropped)                                                                                                     | 0              |                                                   |
|                                                                           | 16. Mechanical stress from multiple abrasive interactions (e.g., exposure to dirt, grit, friction with other objects, etc.)                                                                                          | 5              |                                                   |
|                                                                           | 17. Intense abrasion due to an intentional or unintentional repetitive motion with significant friction                                                                                                              | 0              |                                                   |
|                                                                           | 18. Separation of parts of the material due to strong abrasive or shear forces                                                                                                                                       | 0              |                                                   |
|                                                                           | 19. Mechanical stress caused by a drill or drilling-like interaction                                                                                                                                                 | 0              |                                                   |
|                                                                           | 20. Strong abrasion due to repetitive impact of small, abrasive material, including intentional sandblasting or incidental exposure (e.g., wind-blown particles)                                                     | 0              |                                                   |
| 21. Shaking, bumping, bouncing or other mechanical stress due to movement | 1                                                                                                                                                                                                                    |                |                                                   |
| Combustion                                                                | 22. The material will be incinerated or exposed to flame, fire, or combustion during use                                                                                                                             | 0              | 0                                                 |
| Chemical Reactivity                                                       | 23. It will be exposed to chemical agents for cleaning                                                                                                                                                               | 1              | 0.8                                               |
|                                                                           | 24. It will be exposed to surfactants                                                                                                                                                                                | 1              |                                                   |
|                                                                           | 25. The material can inadvertently come into contact with other chemical solutions (spills, splashes, sprays, accidental exposure, etc.)                                                                             | 0              |                                                   |
| Corrosion                                                                 | 26. It will be subjected to corrosive cleaning agents                                                                                                                                                                | 1              | 2.3                                               |
|                                                                           | 27. The material will be subjected to redox in the environment                                                                                                                                                       | 1              |                                                   |



| Category | Question                                                                             | Question Score | Total Release Score (90 <sup>th</sup> Percentile) |
|----------|--------------------------------------------------------------------------------------|----------------|---------------------------------------------------|
|          | 28. The material will be used in salt water environments                             | 5              |                                                   |
| Aging*   | 29. Given the product use characteristics and properties is material aging a concern | 5*             | 5*                                                |

## References

1. US Research Nanomaterials, Inc., *Manganese Dioxide (MnO<sub>2</sub>) Nanopowder / Nanoparticles Material Safety Data Sheet*, Revised 11/20/2017, 2017.
2. S.F. Hansen, K. Jensen and A. Baun, NanoRiskCat: A Conceptual Tool for Categorization and Communication of Exposure Potentials and Hazards of Nanomaterials in Consumer Products, *J. Nanopart. Res.*, 2014, **16**, 2195-2220.
3. S.F. Hansen, K. Jensen and A. Baun, Erratum to: NanoRiskCat: A Conceptual Tool for Categorization and Communication of Exposure Potentials and Hazards of Nanomaterials in Consumer Products, *J. Nanopart. Res.*, 2014, **19**, 236, DOI 10.1007/s11051-017-3909-4.
4. S.F. Hansen, E.S. Michelson, A. Kamper, P. Borling, F. Stuer Lauridsen and A. Baun, Categorization Framework to Aid Exposure Assessment of Nanomaterials in Consumer Products, *Ecotoxicol.*, 2008, **17**(5), 438-447.
5. European Chemicals Agency (ECHA), *Classification, Labelling and Packaging (CLP) Regulation*, Helsinki, Finland, 2013.
6. Licara NanoSCAN, <https://diamonds.tno.nl/licara/index.php#/introduction>, (Accessed May 9, 2018), 2018.
7. Swiss Federal Office of Public Health, *Precautionary Matrix for Synthetic Nanomaterials*, Berne, Switzerland, 2017.
8. B. van Duuren-Stuurman, S. Vink, K. Verbist, H. Heussen, D. Brouwer, D. Kroese, M. Van Niftrik, E. Tielemans and W. Fransman, Stoffenmanager Nano Version 1.0: A Web-Based Tool for Risk Prioritization of Airborne Manufactured Nano Objects, *An. Occupat. Hyg.*, 2012, **56**(5), 525-541.
9. S.F. Hansen, A. Baun and K. Alstrup-Jensen, *NanoRiskCat – A Conceptual Decision Support Tool for Nanomaterials*, Environmental Project No. 1372 2011, Danish Ministry of the Environment/Danish EPA, Copenhagen, Denmark, 2011.
10. NanoGRID, *Nano Guidance for Risk Informed Deployment*, US Army Corps of Engineers, Engineer Research and Development Center, 2017.
11. Dutch National Institute for Public Health and the Environment, *SimpleBox4Nano*, 2017.
12. H.H. Liu, M. Bilal, A. Lazareva, A. Keller and Y. Cohen, Simulation Tool for Assessing the Release and Environmental Distribution of Nanomaterials, *Beilstein J. Nanotechnol.*, 2015, **6**, 938–951.
13. ECHA, *Guidance on Information Requirements and Chemical Safety Assessment-Chapter R.10: Characterisation of Dose[Concentration]-Response for Environment*, Helsinki, Finland, 2008.
14. ECHA, *Guidance on Information Requirements and Chemical Safety Assessment-Chapter R.16: Environmental Exposure Estimation Version 2.1*. European Chemicals Agency, Helsinki, Finland, 2012.
15. A.J. Wagner, C.A. Bleckmann, R.C. Murdock, A.M. Schrand, J.J. Schlager and S.M. Hussain, Cellular Interaction of Different Forms of Aluminum Nanoparticles in Rat Alveolar Macrophages, *J. Phys. Chem. B*, 2007, **111**, 7353-7359.
16. L. Braydich-Stolle, S. Hussain, J. Schlager and M. Hoffmann, In Vitro Cytotoxicity of Nanoparticles in Mammalian Germline Stem Cells, *Toxicol. Sci.*, 2005, **88**(2), 412-419.

17. A.M. Schrand, M.F. Rahman, S.M. Hussain, J.J. Schlager, D.A. Smith and A.F. Syed, Metal-Based Nanoparticles and their Toxicity Assessment, *WIREs Nanomed. Nanobiotechnol.*, 2010, **2**, 544-568.
18. Alfa Aesar, Safety Data Sheet per OSHA HazCom 2012: Aluminum Powder, <https://www.alfa.com/en/content/msds/USA/45546.pdf> (Accessed May 7, 2018), 2015.
19. National Institute for Occupational Safety and Health (NIOSH), *Pocket Guide: Aluminum*, NIOSH Pocket Guide to Chemical Hazards, 2016.
20. Skyspring Nanomaterials, Inc., Material Safety Data Sheet: Aluminum powder, [www.ssnano.com/i/u/10035073/h/MSDS/MSDS-2016/SDS\\_Al\\_0221XH.pdf](http://www.ssnano.com/i/u/10035073/h/MSDS/MSDS-2016/SDS_Al_0221XH.pdf), (Accessed March 22, 2018), 2015.
21. N. Strigul, L. Vaccari, C. Galdun, M. Wazne, X. Liu, C. Christodoulatos and K. Jasinkiewicz, Acute Toxicity of Boron, Titanium Dioxide, and Aluminum Nanoparticles to *Daphnia magna* and *Vibrio fischeri*, *Desalination*, 2009, **248**, 771-782.
22. E. Park, J. Sim, Y. Kim, B.S. Han, C. Yoon, S. Lee, M.H. Cho, B.S. Lee and J.H. Kim, A 13-Week Repeated-Dose Oral Toxicity and Bioaccumulation of Aluminum Oxide Nanoparticles in Mice, *Arch. Toxicol.*, 2015, **89**, 371-379.
23. E. Park, H. Kim, Y. Kim, and K. Choi, *Toxicol. Environ. Chem.*, Repeated-Dose Toxicity Attributed to Aluminum Nanoparticles Following 28-day Oral Administration, Particularly on Gene Expression in Mouse Brain, 2010, **93**(1), 120-133.
24. M.G. Morsy, K.S. El-Ala and A.A. Ali, Studies on Fate and Toxicity of Nanoalumina in Male Albino Rats – Lethality, Bioaccumulation and Genotoxicity, *Toxicol. Ind. Health*, 2016, **32**(2), 344-359.
25. A.M. Shirazi, F. Shariati, A.K. Keshavarz and Z. Ramezanzpour, Toxic Effect of Aluminum Oxide Nanoparticles on Green Micro-Algae *Dunaliella salina*, *Int. J. Environ. Res.*, 2015, **9**(2), 585-594.
26. X. Zhu, L. Zhu, Y. Chen and S. Tian. Acute Toxicities of Six Manufactured Nanomaterial Suspensions to *Daphnia magna*, *J. Nanopart. Res.*, 2009, **11**, 67-75.
27. S. Pakrashi, S. Dalai, A. Humayan, S. Chakravarty, N. Chandrasekaran and A. Mukherjee, *Cerodaphnia dubia* as a Potential Bio-Indicator for Assessing Acute Aluminum Oxide Nanoparticle Toxicity in Fresh Water Environment, *PLoS ONE*, 2013, **8**(9), DOI: 10.1371/journal.pone.0074003.
28. H. Karlsson, P. Cronholm, J. Gustafsson and L. Moller, Copper Oxide Nanoparticles Are Highly Toxic: A Comparison between Metal Oxide Nanoparticles and Carbon Nanotubes, *Chem. Res. Toxicol.*, 2008, **21**, 1726–1732.
29. B. Fahmy and S. Cormier, Copper Oxide Nanoparticles induce Oxidative Stress and Cytotoxicity in Airway Epithelial Cells, *Toxicol. in Vitro*, 2009, **23**, 1365-1371.
30. US Research Nanomaterials, Inc., Safety Data Sheet: Copper Oxide (CuO) Nanopowder / Nanoparticles, <http://s.b5z.net/i/u/10091461/f/MSDS-NANOPOWDERS/US3063.pdf>, (Accessed March 23, 2018), 2017.
31. ECHA, *Substance information: Copper Oxide*, Helsinki, Finland, 2018a.
32. K. Juganson, A. Ivask, I. Blinova, M. Mortimer and A. Kahru, Nano E-Tox Database, *Beilstein J. Nanotechnol.*, 2015, **6**, 1788–1804.

33. V. Aruoja, H.C. Dubourguier, K. Kasemets and A. Kahru, Toxicity of Nanoparticles of CuO, ZnO and TiO<sub>2</sub> to Microalgae *Pseudokirchneriella subcapitata*, *Sci. Total Environ.*, 2009, **407**(4), 1461–1468.
34. M. Heinlaan, A. Ivask, I. Blinova, H.C. Dubourguier and A. Kahru, Toxicity of Nanosized and Bulk ZnO, CuO and TiO<sub>2</sub> to Bacteria *Vibrio Fischeri* and Crustaceans *Daphnia Magna* and *Thamnocephalus Platyurus*, *Chemosphere*, 2008, **71**(7), 1308–1316.
35. M. Ates, V. Demir, Z. Arslan, H. Kaya, S. Yilmaz and M. Camas, Chronic Exposure of Tilapia (*Oreochromis niloticus*) to Iron Oxide Nanoparticles – Effects of Particle Morphology on Accumulation, Elimination, Hematology and Immune Response, *Aquat. Toxicol.*, 2016, **177**, 22–32.
36. V. Dhakshinamoorthy, V. Manickam and E. Perumal, Neurobehavioural Toxicity of Iron Oxide Nanoparticles in Mice, *Neurotoxic. Res.*, 2017, **32**, 187–203.
37. U.A. Reddy, P.V. Prabhakar and M. Mahboob, Biomarkers of Oxidative Stress for In Vivo Assessment of Toxicological Effects of Iron Oxide Nanoparticles, *Saudi J. Biol. Sci.*, 2017, **24**, 1172–1180.
38. A. Murray, E. Kisin, A. Inman, S.H. Young, M. Muhammed, T. Burks, A. Uheida, A. Tkach, M. Waltz, V. Castranova, B. Fadeel, V. Kagan, J. Riviere, N. Monteiro-Riviere and A. Shvedova, Oxidative Stress and Dermal Toxicity of Iron Oxide Nanoparticles, *In Vitro Cell Biochem Biophys*, 2013, **67**, 461–476.
39. US Research Nanomaterials, Inc., Safety Data Sheet: Iron Oxide (Fe<sub>2</sub>O<sub>3</sub>) Nanoparticles / Nanopowder Water Dispersion, <http://s.b5z.net/i/u/10091461/f/MSDS-Dispersion/US7220.pdf>, (Accessed October 23, 2017), 2017.
40. X. Zhu, S. Tian and Z. Cai, Toxicity Assessment of Iron Oxide Nanoparticles in Zebrafish (*Danio rerio*) Early Life Stages, *Plos One*, 2012, DOI: <https://doi.org/10.1371/journal.pone.0046286>.
41. L. Wang, L. Wang, W. Ding and F. Zhang, Acute Toxicity of Ferric Oxide and Zinc Oxide Nanoparticles in Rats, *J. Nanosci. Nanotechnol.*, 2010, **10**(12), 8617–8624.
42. ECHA, *Hematite (Fe<sub>2</sub>O<sub>3</sub>): Toxicological Summary*, Helsinki, Finland, 2018.
43. ECHA, *Summary of Classification and Labelling: Magnesium oxide*, Helsinki, Finland, 2018c.
44. M. Ghobadian, M. Nabiuni, K. Parivar, M. Fathi and J. Pazooki, Toxic Effects of Magnesium Oxide Nanoparticles on Early Developmental and Larval Stages of Zebrafish (*Danio rerio*), *Ecotoxicol. Environ. Saf.*, 2015, **122**, 260–267.
45. ECHA, *Summary of Classification and Labelling, Harmonised classification - Annex VI of Regulation (EC) No 1272/2008 (CLP Regulation), Manganese dioxide*, Helsinki, Finland, 2018d.
46. G. Karunakaran, J. Matheswaran, G. Alexander, K. Evgeny and K. Denis, Assessment of FeO and MnO Nanoparticles Toxicity on *Chlorella pyrenoidosa*, *Nanosci. Nanotechnol.*, 2017, **17**(3), 1712–1720.
47. ECHA, *Titanium Dioxide Proposed to be Classified as Suspected of Causing Cancer when Inhaled*, Helsinki, Finland, 2017.
48. L. Clément, C. Hurel and N. Marmier, Toxicity of TiO<sub>2</sub> Nanoparticles to Cladocerans, Algae, Rotifers and Plants - Effects of Size and Crystalline Structure, *Chemosphere*, 2013, **90**, 1083–1090.
49. A. Dabrunz, L. Duester, C. Prasse, F. Seitz, R. Rosenfeldt, C. Schilde, G. Schaumann and R. Schulz, Biological Surface Coating and Molting Inhibition as Mechanisms of TiO<sub>2</sub> Nanoparticle Toxicity in *Daphnia magna*, *PLoS ONE*, 2011, **6**(5), DOI: 10.1371/journal.pone.0020112.

50. S. Dalai, S. Pakrashi, N. Chandrasekaran and A. Mukherjee, Acute Toxicity of TiO<sub>2</sub> Nanoparticles to *Ceriodaphnia dubia* under Visible Light and Dark Conditions in a Freshwater System, *PLoS ONE*, 2013, **8**(4), DOI: 10.1371/journal.pone.0062970.
51. S. Lanone, F. Rogerieux, J. Geys, A. Dupont, E. Maillot-Marechal, J. Boczkowski, G. Lacrois and P. Hoet, Comparative Toxicity of 24 Manufactured Nanoparticles in Human Alveolar Epithelial and Macrophage Cell Lines, *Part. Fibre Toxicol.*, 2009, **6**, 14-26.
52. R. Buesen, R. Landsiedel, U. Sauer, W. Wohlleben, S. Groeters, V. Strauss, H. Kamp and B. van Ravenzwaay, Effects of SiO<sub>2</sub>, ZrO<sub>2</sub>, and BaSO<sub>4</sub> Nanomaterials with or Without Surface Functionalization upon 28-day Oral Exposure to Rats, *Arch. Toxicol.*, 2014, **88**(10), 1881–1906.
53. M. Lucarelli, A. Gatti, G. Savarino, P. Quattroni, L. Martinelli, E. Monari and D. Boraschi, Innate Defense Functions of Macrophages can be Biased by Nano-Sized Ceramic and Metallic Particles, *Eur. Cytokine Network*, 2004, **15**(4), 339-346.
54. K. Soto, A. Carrasco, T. Powell, K. Garza and L. Murr, Comparative In Vitro Cytotoxicity Assessment of Some Manufactured Nanoparticulate Materials Characterized by Transmission Electron Microscopy, *J. Nanopart. Res.*, 2005, **7**, 145-169.
55. M. Mishra, D. Sabat, B. Ekka, S. Sahu, P. Unnikannan and D. Priyabrat, Oral Intake of Zirconia Nanoparticle Alters Neuronal Development and Behaviour of *Drosophila melanogaster*, *J. Nanopart. Res.*, 2017, **19**, DOI: <https://doi.org/10.1007/s11051-017-3971-y>.
56. LTS Research Laboratories, Inc, Safety Data Sheet: Zirconium oxide, [http://www.ltschem.com/msds/ZrO<sub>2</sub>.pdf](http://www.ltschem.com/msds/ZrO2.pdf), (Accessed March 23, 2018), 2015.
57. L. Heckmann, M. Hovgaard, D. Sutherland, H. Autrup, F. Besenbacher and J. Scott-Fordsmand, Limit-Test Toxicity Screening of Selected Inorganic Nanoparticles to the Earthworm *Eisenia Fetida*, *Ecotoxicol.*, 2011, **20**, 226-233.
58. G. Karunakaran, R. Suriyaprabha, P. Manivasakan, R. Yuvakkumar, V. Rajendran and N. Kannan, Impact of Nano and Bulk ZrO<sub>2</sub>, TiO<sub>2</sub> Particles on Soil Nutrient Contents and PGPR, *J. Nanosci. Nanotechnol.*, 2013, **13**(1), 678-85.
59. M. Miseljic and S. Olsen, Life-Cycle Assessment of Engineered Nanomaterials: A Literature Review of Assessment Status, *J. Nanopart. Res.*, 2014, **16**, 2427-2460.
60. G. Wernet, C. Bauer, B. Steubing, J. Reinhard, E. Moreno-Ruiz and B. Weidema, The Ecoinvent Database Version 3 (Part I): Overview and Methodology, *Int. J. Life Cycle Assess.*, 2016, **21**(9), 1218–1230.
61. L. Limbach, R. Bereiter, E. Muller, R. Krebs, R. Galli, W. Stark, Removal of Oxide Nanoparticles in a Model Wastewater Treatment Plant: Influence of Agglomeration and Surfactants on Clearing Efficiency, *Environ. Sci. Technol.*, 2008, **42**(15), 5828-5833.
62. L. Li, M. Stoiber, A. Wimmer, Z. Xu, C. Lindenblatt, B. Helmreich and M. Schuster, To What Extent Can Full-Scale Wastewater Treatment Plant Effluent Influence the Occurrence of Silver-Based Nanoparticles in Surface Waters? *Environ. Sci. Technol.*, 2016, **50**(12), 6327-6333.
63. T. Walser, L. Limbach, R. Brogioli, E. Erisman, L. Flamigni, B. Hattendorf, M. Juchli, F. Krumeich, C. Ludwig, K. Prikopsky, M. Rossier, D. Saner, A. Sigg, S. Hellweg, D. Gunther and W. Stark,

Persistence of Engineered Nanoparticles in a Municipal Solid-Waste Incineration Plant, *Nat. Nanotechnol.*, 2012, **7**, 520-524.

64. P. Westerhoff, M. Kiser and K. Hristovski, Nanomaterial Removal and Transformation During Biological Wastewater Treatment, *Environ. Eng. Sci.*, 2013, **30**(3), DOI: <https://doi.org/10.1089/ees.2012.0340>.
65. P. Westerhoff, G. Song, K. Hristovski and M. Kiser, Occurrence and Removal of Titanium at Full Scale Wastewater Treatment Plants: Implications for TiO<sub>2</sub> Nanomaterials, *J. Environ. Monitor.*, 2011, **13**, 1195-1203.
66. A. Massari, M. Beggio, S. Hreglich, R. Marin and S. Zuin, Behavior of TiO<sub>2</sub> Nanoparticles During Incineration of Solid Paint Waste: A Lab-Scale Test, *Waste Manag.*, 2014, **34**(10), 1897-1907.
67. Z. Mousavi, M. Hassanpourezatti, P. Najafizadeh, S. Rezagholian, M. Rhamanifar and N. Nosrati, Effects of Subcutaneous Injection MnO<sub>2</sub> Micro- and Nanoparticles on Blood Glucose Level and Lipid Profile in Rat, *Iran. J. Med. Sci.*, 2016, **41**(6), 518-524.
68. ThermoFisher Scientific, *Safety Data Sheet: Aluminum Oxide*, Revision Date 07/19/2017, 2017.
69. Alfa Aesar, Safety Data Sheet: Copper (II) Oxide Nanopowder, <https://www.alfa.com/en/content/msds/USA/44663.pdf> (Accessed May 7, 2018), 2015.
70. Alfa Aesar, Safety Data Sheet: Iron (III) Oxide Nanopowder, <https://www.alfa.com/en/content/msds/USA/44119.pdf> (Accessed May 7, 2018), 2015.
71. ThermoFisher Scientific, *Safety Data Sheet: Magnesium Oxide Nanopowder*, Revision Date 11/06/2017, 2017b.
72. Alfa Aesar, Safety Data Sheet: Titanium (IV) Oxide, Anatase, Nanopowder, <https://www.alfa.com/en/content/msds/USA/45603.pdf> (Accessed May 7, 2018), 2016.
73. Sigma-Aldrich, Safety Data Sheet: Zirconium(IV) Oxide, <https://www.sigmaaldrich.com/MSDS/MSDS/DisplayMSDSPage.do?country=US&language=en&productNumber=544760&brand=ALDRICH&PageToGoToURL=https%3A%2F%2Fwww.sigmaaldrich.com%2Fcatalog%2Fproduct%2Faldrich%2F544760%3Flang%3Den>, (Accessed May 7, 2018), 2016.
74. W.G. Kreyling, M. Semmler-Behnke and Q. Chaudhry, A Complementary Definition of Nanomaterial, *Nano Today*, 2010, **5**, 165-168.
75. European Commission (EC), *Commission Recommendation of 18 October 2011 on the Definition of Nanomaterial. Official Journal of the European Union*, 2011/696/EU, Brussels, 2011.
76. US Environmental Protection Agency (EPA), *Chemical Substances When Manufactured or Processed as Nanoscale Materials; TSCA Reporting and Recordkeeping Requirements*, TSCA Section 8a, 2017.
77. I. Blinova, A. Ivask, M. Heinlaan, M. Mortimer and A. Kahru, Ecotoxicity of Nanoparticles of CuO and ZnO in Natural Water, *Environ. Pollut.*, 2010, **158**(1), 41-47.
78. M. Mortimer, K. Kasemets, M. Vodovnik, R. Marinsek-Logar and A. Kahru, Exposure to CuO Nanoparticles Changes the Fatty Acid Composition of Protozoa *Tetrahymena thermophila*, *Environ. Sci. Technol.*, 2011, **45**(15), 6617-6624.

79. L. Manusadzianas, C. Caillet, L. Fachetti, B. Gylyte, R. Grigutyte, S. Jurkoniene, R. Karitonas, K. Sadauskas, F. Thomas, R. Vitkus and J. Ferard, Toxicity of Copper Oxide Nanoparticle Suspensions to Aquatic Biota, *Environ. Toxicol. Chem.*, 2011, **31**(1), 108-114.
80. J. Hu, D. Wang, J. Wang and J. Wang, Bioaccumulation of Fe<sub>2</sub>O<sub>3</sub> (Magnetic) Nanoparticles in *Ceriodaphnia dubia*, *Environ. Pollut.*, 2012, **162**, 216-222.
81. K. Krishnamoorthy, J. Moon, H. Hyun, S. Cho and S. Jae Kim, Mechanistic Investigation on the Toxicity of MgO Nanoparticles toward Cancer Cells, *J. Mater. Chem.*, 2012, **22**, 24610-24617.
82. L. Otero-Gonzales, C. Garcia-Saucedo, J. Field, and R. Sierra-Alvarez, Toxicity of TiO<sub>2</sub>, ZrO<sub>2</sub>, FeO, Fe<sub>2</sub>O<sub>3</sub>, and Mn<sub>2</sub>O<sub>3</sub> Nanoparticles to the Yeast, *Saccharomyces cerevisiae*, *Chemosphere*, 2013, **93**(6), 1201-1206.
83. I. Amiano, J. Olabarrieta, J. Vitorica and S. Zorita, Acute Toxicity of Nanosized TiO<sub>2</sub> to *Daphnia Magna* under UVA Irradiation. *Environ. Toxicol. Chem.*, 2012, **31**(11), 2564-2566.
84. H. Sun, H. Zhang, Z. Zhang, Y. Chen and J. Crittenden, Influence of Titanium Dioxide Nanoparticles on Speciation and Bioavailability of Arsenite, *Environ. Pollut.*, 2009, **157**(4), 1165-1170.
85. R. Griffit, K. Hyndman, N. Denslow and D. Barber, Comparison of Molecular and Histological Changes in Zebrafish Gills Exposed to Metallic Nanoparticles, *Toxicol. Sci.*, 2009, **107**(2), 404-415.
86. Y. Wang and B. Nowack, Dynamic Probabilistic Material Flow Analysis of Nano-SiO<sub>2</sub>, Nano Iron Oxides, Nano-CeO<sub>2</sub>, Nano-Al<sub>2</sub>O<sub>3</sub>, and Quantum Dots in Seven European Regions, *Environ. Pollut.*, 2018, **235**, 589-601.
87. T. Sun, F. Gottschalk, K. Hungerbuhler and B. Nowack, Comprehensive Probabilistic Modelling of Environmental Emissions of Engineered Nanomaterials, *Environ. Pollut.*, 2014, **185**, 69-76.
88. National Institute for Occupational Safety and Health (NIOSH), *Occupational Exposure to Titanium Dioxide: Current Intelligence Bulletin 63*, Department of Health and Human Services, Centers for Disease Control and Prevention, NIOSH Publication No. 2011-160, 2011.
